## **Mucin-derived *O*-glycans supplemented to diet mitigate diverse microbiota perturbations**

Pruss K. M.<sup>1\*</sup>, Marcobal A.<sup>1\*</sup>, Southwick A.M.<sup>1</sup>, Dahan D.<sup>1</sup>, Smits S.A.<sup>1</sup>, Ferreyra J.A.<sup>1</sup>,  
Higginbottom S.K.<sup>1</sup>, Sonnenburg E.D.<sup>1</sup>, Kashyap P.C.<sup>2</sup>, Choudhury B.<sup>3</sup>, Bode L.<sup>4</sup>, and J. L.,  
Sonnenburg<sup>1,5#</sup>

<sup>1</sup> Department of Microbiology and Immunology, Stanford University School of Medicine,  
Stanford CA, USA

<sup>2</sup> Department of Gastroenterology and Hepatology, Mayo Clinic, Rochester, MN, USA

<sup>3</sup> Glycobiology Research and Training Center, University of California, San Diego, CA, USA

<sup>4</sup> Division of Neonatology and Division of Gastroenterology and Nutrition, Department of  
Pediatrics, University of California, San Diego, CA, USA

<sup>5</sup> Chan Zuckerberg Biohub, San Francisco, CA 94158

\* These authors contributed equally

# Corresponding author: Justin L. Sonnenburg

[jsonnenburg@stanford.edu](mailto:jsonnenburg@stanford.edu)

(650) 721-1510

Fax. 650-498-7147

Running title: *O*-glycans mitigate microbiota disturbance

Author competing interests: Pruss K.M., Marcobal A., Southwick A.M., Dahan D., Smits S.A.,  
Higginbottom S.K, Sonnenburg E.D, Kashyap P.C., Choudhury B., Bode L., no conflicts of  
interest. J. Ferreyra is a scientist at NGM Biopharmaceuticals. J. L. Sonnenburg is a founder of  
Novome Biotechnologies, Inc., January. ai, and a scientific advisor for Second Genome and  
Gnubiotics, who has licensed intellectual property related to this manuscript.

1 **Abstract**

2 Microbiota-accessible carbohydrates (MACs) are powerful modulators of microbiota  
3 composition and function. These substrates are often derived from diet, such as complex  
4 polysaccharides from plants or human milk oligosaccharides (HMOs) during breastfeeding.  
5 Host-derived mucus glycans on gut-secreted mucin proteins may serve as a continuous  
6 endogenous source of MACs for resident microbes; here we investigate the potential role of  
7 purified, orally-administered mucus glycans in maintaining a healthy microbial community. In  
8 this study, we liberated and purified *O*-linked glycans from porcine gastric mucin and assessed  
9 their efficacy in shaping the recovery of a perturbed microbiota in a mouse model. We found that  
10 porcine mucin glycans (PMGs) and HMOs enrich for taxonomically similar resident microbes.  
11 We demonstrate that PMGs aid recovery of the microbiota after antibiotic treatment, suppress *C.*  
12 *difficile* abundance, delay the onset of diet-induced obesity, and increase relative abundance of  
13 resident *Akkermansia muciniphila*. *In silico* analysis revealed that genes associated with mucus  
14 utilization are abundant and diverse in prevalent gut commensals and rare in enteric pathogens,  
15 consistent with these glycan-degrading capabilities being selected for during host development  
16 and throughout evolution of the host-microbe relationship. Importantly, we identify mucus  
17 glycans as a novel class of prebiotic compounds that can be used to mitigate perturbations to the  
18 microbiota and provide benefits to host physiology.

19

20 **Keywords:** Human milk oligosaccharides, Porcine mucin glycans, gut microbiota, diet-induced  
21 obesity, *Clostridium difficile*, prebiotics

22

23

## 24 **Introduction**

25 The luminal surface of the gastrointestinal tract is covered by a viscous mucus layer, which  
26 serves as the primary interface at which the host interacts with a dense microbial community.  
27 Secreted by host goblet cells, mucus is largely composed of highly glycosylated mucin proteins.  
28 The gel-like mesh of mucins provides both a barrier to shield the host from direct interaction  
29 with microbes, preventing inflammation[1], but also provides an energy-rich substrate for the  
30 microorganisms that reside in the gut[2, 3]. Degradation of the diverse chemical linkages within  
31 endogenous glycans requires a specialized set of glycoside hydrolases, reflected in the genetic  
32 composition of the gut microbiota. Notably, species prevalent in the human gut microbiota often  
33 possess broad glycan-degrading capabilities while “specialist” species may have narrower  
34 glycan-degrading potential[4].

35 The structural features of intestinal mucus glycans are strikingly similar to those of  
36 human milk oligosaccharides (HMOs)[5]. Mucin glycans are built upon an *N*-acetyl-  
37 galactosamine that is *O*-linked to serine and threonine residues of the mucin protein, while  
38 HMOs are built upon a lactose core structure universally present at the reducing end of these  
39 glycans[6]. In both mucin glycans and HMOs, the priming carbohydrate structure is extended  
40 with galactose-*N*-acetylglucosamine disaccharides and chains often terminate with fucose or  
41 sialic acid residues[7].

42 HMOs are the third most abundant compound in breast milk, after lactose and fat[8].  
43 Colostrum is particularly rich in HMOs, the concentration ranging from 20-25 g/L in the first  
44 milk produced and decreasing to 5-20 g/L in more mature milk[9–11]. Numerous and diverse  
45 beneficial effects have been attributed to HMOs in breast milk during infant development[12–  
46 20].

47           Recently, extensive research has focused on the potential prebiotic role of HMOs. HMOs  
48   are indigestible by humans and are degraded throughout the gastrointestinal tract of breast-fed  
49   infants[21], becoming the primary microbiota-accessible carbohydrates available in the newborn  
50   diet. Species belonging to the genera *Bifidobacteria* and *Bacteroides* are optimal HMO-  
51   consumers: *Bifidobacterium longum* subsp. *infantis* and *Bifidobacterium bifidum* encode in their  
52   genomes clusters of genes dedicated to HMO utilization[22–24]. *Bacteroides thetaiotaomicron*,  
53   described as a “generalist-glycan-consumer” due to the numerous glycoside hydrolases encoded  
54   in its genome, grows efficiently on HMOs *in vitro*[5, 25]. *In vivo* studies with gnotobiotic mice  
55   revealed that lacto-*N*-neotetraose, one of the most abundant oligosaccharides in HMOs, provides  
56   an advantage to *B. infantis* over *B. thetaiotaomicron* in gut colonization[5]. However, the *in vivo*  
57   effect of the structurally diverse HMO pool in microbiota composition remains under-explored.

58           In the infant gut, MAC-consuming bacteria that reach the intestinal tract must rely  
59   primarily on HMOs or mucus as growth substrates. Interestingly, transcriptional data  
60   demonstrates that HMO utilization in *Bacteroides* and *Bifidobacterium* relies on pathways that  
61   also play a role in mucus utilization[5]. As HMOs have been described to confer numerous  
62   benefits to infants and similarities between microbial metabolism of HMOs and mucin glycans  
63   has been shown, we investigated the extent to which mucin glycans are able to confer benefits to  
64   the microbiota and host. We hypothesized that targeting convergent glycan-utilization pathways  
65   in the adult gut community with exogenously-administered porcine mucin glycans (PMGs) could  
66   mitigate perturbations to the microbiota.

67           Empirical studies of the human microbiota can be performed in a controlled environment  
68   by colonizing germ free (GF) mice with specific strains of bacteria (gnotobiotic) or a complete  
69   microbial community from human feces (humanized). The humanized mouse model

70 recapitulates the vast majority of human microbiota compositional and functional features[26,  
71 27]. In this work, we use both gnotobiotic and humanized mice to establish that the gut  
72 microbiota efficiently consumes HMOs. Furthermore, we demonstrate that a complex mix of  
73 glycans isolated from porcine mucin recreates some of the effect of HMOs on the gut microbiota  
74 and mitigates the negative effects of various community perturbations including antibiotic  
75 treatment, pathogen invasion, and a high-fat diet.

76

## 77 **Results**

### 78 **HMOs are consumed by members of the microbiota, conferring a growth advantage to** 79 ***Bifidobacterium* over *Bacteroides* *in vivo*.**

80 We and others have previously reported the ability of both *Bacteroides* and *Bifidobacterium* to  
81 utilize select HMOs *in vitro*[5, 28]; as such, we wished to determine whether complex HMOs  
82 isolated from human donors favored *Bifidobacterium* or *Bacteroides* within the context of the gut  
83 environment. 6-week old GF mice were bi-colonized with two HMO-utilizing taxa common to  
84 the infant gut: *Bacteroides thetaiotaomicron* (*Bt*) and *Bifidobacterium longum* subsp *infantis* (*B.*  
85 *infantis*). Mice were fed a MAC-deficient (MD) diet supplemented with HMOs (1% in water,  
86 chosen to approximate the mass of HMOs consumed by human newborns, adjusted for body  
87 weight, see Methods) for one week. Feces and cecal contents were collected and milk glycans  
88 were measured by HPLC from all samples. In bi-colonized mice, no HMOs were detectable,  
89 whereas GF mice samples revealed a high concentration of milk glycans in both the fecal (**Fig**  
90 **1A**) and cecal samples (**Fig S1A, B**), demonstrating that HMO-utilizing members of the  
91 commensal microbiota deplete HMOs within the host large intestine.

92 *In vitro*, *Bt* grows better on mucus glycans than *B. infantis*, whereas *B. infantis* grows  
93 better on HMOs than *Bt*[5]. After 1 week, HMO supplementation resulted in an expansion in the  
94 population of *B. infantis* relative to *Bt* compared to mice on regular water ( $24.3 \pm 3.12$  % versus  
95  $2.5 \pm 1.45$  % on day 7;  $P < 0.01$ ,  $n=4$  mice) (**Fig 1B**). These results confirm that HMOs provide a  
96 selective advantage to *B. infantis* over *Bt in vivo*. Therefore, although HMOs are utilized by  
97 generalist glycan degraders, they can provide a competitive advantage to microbes that specialize  
98 in HMO utilization.

### 99 **HMOs shape the composition of the gut microbiota**

100 To address the extent to which HMOs shape a complex microbial community, we administered  
101 purified HMOs to ex-GF mice colonized for 6 weeks with a human microbiota (humanized).  
102 Compared to either a standard mouse diet rich in MACs (MAC<sup>+</sup>) diet or MD diet alone, purified  
103 HMOs engender a distinct microbial community (**Fig 1C**). HMO supplementation to MD diet led  
104 to the significant enrichment of the known mucin glycan degraders *Bacteroides caccae* and  
105 *Akkermansia muciniphila*[25], as well as polysaccharide generalists *Bacteroides ovatus* and  
106 *Bacteroides eggerthii* (**Fig 1D**).

107 Purified HMOs are structurally diverse, comprised of many molecules with different  
108 chemical properties[6]. An important question is whether glycans with slight structural  
109 differences within HMO mixtures can differentially impact the community. To investigate  
110 whether structural nuance in exogenous glycans led to changes in the composition of the gut  
111 microbiota, we employed two of the most abundant glycans found in HMOs and administered  
112 them in pure form to humanized mice. Lacto-*N*-tetraose (LNT, Gal $\beta$ 1-4GlcNAc $\beta$ 1-3Gal $\beta$ 1-4Glc)  
113 and Lacto-*N*-neotetraose (LNnT, Gal $\beta$ 1-3GlcNAc $\beta$ 1-3Gal $\beta$ 1-4Glc) differ only in the placement  
114 of a linkage between galactose and *N*-acetylglucosamine (**Fig S1C**). Germ-free mice were

115 humanized and then switched to MD supplemented with LNT or LNnT (1% w/v in water) or  
116 maintained on MAC<sup>+</sup> with plain water.

117         Bray-Curtis dissimilarity metric reveals clear separation of microbiota composition  
118 between mice consuming a MAC<sup>+</sup> diet from MD supplemented with either of the two HMOs.  
119 Moderate but significant separation in composition was also observed between LNT versus  
120 LNnT supplementation in the MD diet (**Fig S1D**). The switch from MAC<sup>+</sup> to MD background  
121 diet drives high-level structural changes to the composition of the humanized gut microbiota (**Fig**  
122 **S1E**). However, nuanced higher-resolution taxonomic changes occur corresponding to  
123 supplementation of one of two isomeric tetrasaccharides that differ in a single glycosidic linkage:  
124 nine taxa were significantly different at adjusted *P* value < 0.01 between LNT and LNnT  
125 supplementation (parametric Wald test[29], data not shown), including four ASVs belonging to  
126 the Bacteroidales family S24-7, *Coprococcus spp.* and *Sutterella spp.*, two unidentified  
127 Erysipelotrichaceae (enriched with LNnT), and one unidentified *Blautia* strain (LNT).  
128 Accordingly, a Random Forests classifier predicts the three diets with 87.5% accuracy (out-of-  
129 bag estimate of error, with 30% class error for LNnT, 10% for LNT, and 0% for SD. Leave-one-  
130 out cross-validation results in accuracy of 94%), supporting the subtle but significant differences  
131 imparted onto the gut community by two synthetic oligosaccharides.

### 132 **Structural analysis reveals similarities between PMGs and HMOs**

133 HMOs are structurally similar to mucin glycans. We modified a described protocol[30] for  
134 purifying neutral *O*-glycans from commercially available porcine mucin using reductive β-  
135 elimination followed by anion exchange chromatography, and characterized the purified  
136 material. Hydrolysis with TFA and HPAEC-PAD analysis revealed that PMGs are composed of  
137 units of glucosamine, galactosamine, galactose, glucose, fucose and mannose, consistent with

138 previous reports of mucin glycan composition ([31], **Fig 2A**). The unexpected presence of  
139 mannose, a monosaccharide not commonly found in *O*-linked glycans is likely due to a small  
140 amount of liberated *N*-glycan during purification. MALDI-TOF mass spectrometry identified  
141 thirteen major glycans (**Fig 2B**), for which structures were predicted with Glycobench software  
142 (see Materials and Methods) based on *m/z* values, and three of thirteen were confirmed by  
143 MS/MS fragmentation pattern (**Fig 2C, Fig S2**). Structures were inferred for the remaining ten  
144 masses based on previous structural work on mucin glycans (**Fig 2D**). Sialic acid content  
145 quantification from purified PMGs revealed an absence of *N*-acetylneuraminic acid and *N*-  
146 glycolylneuraminic acid (data not shown) consistent with anion chromatographic depletion of the  
147 negatively charged glycan fractions. Our analysis affirms the similarity between PMGs and  
148 HMOs both in terms of structure and constitutive components.

#### 149 **PMGs and HMOs drive similar high-level microbial community changes**

150 Given the structural similarities between PMGs and HMOs, we sought to determine how  
151 exogenously administered PMGs would affect the composition of the gut microbiota. We  
152 administered pools of PMGs (1% in water, to MD or MAC<sup>+</sup> diets) or a common synthetic  
153 prebiotic, galacto-oligosaccharide (GOS, 1% in water to MD) and compared microbiota  
154 composition between these conditions and the HMO supplementation experiment described  
155 above. Similar high-level changes in the community were observed when HMOs, PMGs or GOS  
156 were supplemented to a diet deficient in plant polysaccharides, indicating taxonomic changes at  
157 the family level are driven primarily by background diet (**Fig S3A**). A switch from MAC<sup>+</sup>  
158 background diet to MD led to a reduction in alpha diversity, which was not restored by  
159 administration of any exogenous glycans tested (**Fig S3B**). However, administration of 1%  
160 PMGs to MAC<sup>+</sup> background diet led to a significant increase in alpha diversity (**Fig S3B**). To



161 support this finding, we sought to determine whether a lower concentration of PMG  
162 supplementation would yield the same enrichment, and indeed found that 0.3% PMGs in water  
163 supplemented to a MAC<sup>+</sup> diet led to a similar increase in alpha diversity (**Fig S3C**).

164 While the first principal component of Bray-Curtis dissimilarity is driven by background  
165 diet (MAC<sup>+</sup> versus MD), the second principal component reveals significant separation between  
166 communities supplemented with PMGs or HMOs from MD alone, whereas GOS  
167 supplementation is not significantly different from MD (**Fig 1C**). The gap statistic predicts 5  
168 clusters amongst the 6 diets (MAC<sup>+</sup> +/- 1% PMG; MD +/- 1% PMG, HMO or GOS) (canonical  
169 correspondence analysis, method = firstSEmax[32]), providing further support for nuanced  
170 divergence of microbial communities in response to exogenous glycan administration. As seen  
171 with the administration of pure LNT and LNnT, administration of PMGs or HMOs to MD diet  
172 led to significant changes to the community at lower taxonomic levels. Both HMO (**Fig 1D**) and  
173 PMG supplementation (**Fig S3D**) led to the significant enrichment of the mucin-degrader *B.*  
174 *caccae* and an unidentified member of the *Blautia* genus. PMG supplementation to MD led to a  
175 significant increase in *Bacteroides eggerthii*, whereas *B. fragilis* and *B. ovatus* were enriched  
176 with PMG supplementation to MAC<sup>+</sup> diet (**Fig S3E**).

### 177 **PMGs accelerate recovery from antibiotic perturbation**

178 We next pursued investigation of purified PMGs to mitigate microbiota disturbance. Humanized  
179 mice were switched to MD diet and treated with 1 mg clindamycin concurrent with 1% PMG  
180 supplementation in water. When compared with no supplementation, PMG led to faster recovery  
181 of alpha diversity (**Fig 3A**) and an accelerated trajectory to the baseline community microbiota as  
182 measured by comparison of UniFrac distance to pre-antibiotic timepoints (**Fig 3B**). Furthermore,  
183 mice treated with PMGs exhibit a reduced bloom of Proteobacteria, a hallmark of post-antibiotic

184 oxygenation and inflammation in the gut (**Fig 3C, S4A**, [33, 34]). Additionally, PMG  
185 supplementation with antibiotics leads to a faster recovery of the relative abundance of *A.*  
186 *muciniphila* (**Fig S4B**). These data suggest that exogenous glycans could be simultaneously  
187 administered with a course of antibiotics to aid in recovery to the microbiota.

### 188 **PMGs suppress *C. difficile* abundance**

189 As PMGs augmented community recovery post-antibiotics, we sought to determine whether  
190 exogenous PMGs would affect host susceptibility to an antibiotic-associated pathogen,  
191 *Clostridium difficile* (*Cd*). *Cd* depends on disturbance to the microbiota to cause disease [35, 36]  
192 and thus represented a suitable target to determine whether exogenous mucus glycans could  
193 protect the host from infection.

194 1% PMGs were supplemented to MAC<sup>+</sup> or MD diet, concomitant with antibiotic  
195 treatment (1 mg clindamycin). Mice were gavaged 24 hours later with 200 µl saturated overnight  
196 culture wild-type *Cd* 630 (Day 1). Administration of PMGs to mice on a background diet devoid  
197 of complex polysaccharides significantly reduced the *Cd* burden as measured by 16S rRNA  
198 reads (**Fig 3D**) and selective plating (**Fig S5A**). PMGs supplemented to MAC<sup>+</sup> diet did not affect  
199 *Cd* abundance (**Fig S5B**) or histopathology (**Fig S5C**). Whether the inhibitory effect of PMGs  
200 towards *Cd* occurs via reshaping the microbial community in a way such that *Cd* suffers a  
201 competitive disadvantage, directly inhibiting *Cd* growth or toxin activity[37], or altering host  
202 immune signaling directly or indirectly via the microbiota remains to be determined.

### 203 **PMGs attenuate host weight gain due to High Fat Diet**

204 As *A. muciniphila* has been associated with diet-induced obesity models previously [38–40] and  
205 appears to be manipulable with administration of PMGs, we were interested in whether  
206 administration of PMGs could attenuate the effects of a high-fat diet (HFD) on host physiology.

207 Three groups of age- and sex-matched mice were fed either a standard diet, HFD (60% fat and  
208 20% carbohydrates), or HFD supplemented with 1% PMGs continuously in drinking water and  
209 their weight monitored over three weeks. HFD induced significant weight gain compared to  
210 MAC<sup>+</sup>-diet fed controls, and PMG supplementation to HFD significantly reduced host weight  
211 gain (**Fig 4A**) and development of adipose tissue (**Fig 4B**), despite no differences between the  
212 groups in the amount of food consumed. No differences in glucose tolerance were observed  
213 between HFD-fed mice and PMG supplementation to HFD (data not shown).

214 Exogenous PMG administration to HFD led to a microbial community distinct from that  
215 of MAC<sup>+</sup> or HFD alone. Although HFD induces similar family-level taxonomic changes with or  
216 without PMG supplementation (**Fig 4G**), beta-diversity analysis reveals clear separation of the  
217 humanized microbial communities on the three diets, indicating strong diet-driven changes in  
218 community composition (**Fig 4E, Fig S6A**). Accordingly, Random Forests classifies microbiota  
219 samples into the three diets perfectly (HFD, HFD+PMG, MAC<sup>+</sup>), and regression on percent  
220 weight gain in individual mice from baseline perfectly predicts diet. Predictive features from the  
221 Random Forests models include many members of the family S24-7, genera *Ruminococcus* and  
222 *Eubacterium* (data not shown). Short-chain fatty acid (SCFA) and organic acid (OA) analysis  
223 demonstrates drastically reduced metabolic output of microbial communities on HFD with and  
224 without PMGs (**Fig 4F**), indicating that the phenotypic effect of PMGs during HFD is not  
225 mediated by normalization of SCFA production.

226 To determine whether a shorter duration of PMG administration could attenuate host  
227 weight gain during HFD, humanized mice were switched to HFD and dosed with 1% PMGs for  
228 seven days at 1 and 4 weeks after diet change. Again, exogenous PMG administration led to less  
229 weight gain and significant reduction of fat accumulation (**Fig 4C,D**). Two one-week pulses of

230 PMGs led to a distinct microbial community from HFD alone; gut microbiota composition of  
231 mice dosed with PMGs remains distinct from the HFD-only group even when PMGs are  
232 removed from water (**Fig S6C**). Random Forests again perfectly classifies the microbial  
233 communities into the groups on HFD alone or HFD supplemented transiently with PMGs. HFD  
234 leads to dramatic changes to the relative abundance of bacterial families compared to MAC<sup>+</sup> diet  
235 (**Fig S6B**). Several taxa are significantly enriched due to exogenous PMG administration on  
236 HFD background, including *A. muciniphila* (**Fig S6D**), *B. caccae*, and members of the  
237 Lachnospiraceae family, including *Dorea*, *Coprococcus*, *Coprobacillus*, *Clostridium hathewayi*,  
238 *Blautia*, and *Eubacterium dolichum* (Wald test, adjusted *P* value < 0.0005, **Fig S6E**), which were  
239 also many of the top predictive features of the Random Forests classification (**Table S1**). There  
240 are multiple potential mechanisms by which PMGs could lead to reduced weight gain in mice,  
241 which is an area of important follow-up investigation.

### 242 **Mucin glycan utilization gene clusters are abundant in prevalent commensals and rare in** 243 **pathogens**

244 Given the structural similarities between PMGs and HMOs and the capabilities of PMGs to  
245 mitigate community disturbance, we hypothesized that mucus glycan utilization has played a role  
246 in host and commensal microbiota co-evolution. To explore this hypothesis, we performed a  
247 broad *in silico* search for candidate mucin-degrading carbohydrate gene clusters (CGCs) within  
248 the genomes of 4,500 common human gut commensals in the HGM database[41]. A CGC was  
249 defined as the colocalization of at least two glycoside hydrolases (GH) that have been previously  
250 reported to act on mucin (**Table S2**), plus a transporter or transcription factor within the same  
251 genomic locus. The rationale for requiring two GHs per locus was to increase the stringency in  
252 identifying candidate mucin CGCs: while these GH families contain members that act on mucus

253 glycan structures, some of these families may also contain members that do not target mucin  
254 glycans. Therefore, by requiring two candidate mucin-degrading GHs we sought to reduce the  
255 instances of false positives, accepting that some mucin-degrading CGCs containing only one of  
256 these GH families would be excluded.

257         The phyla Bacteroidetes and Firmicutes contain the taxa with the highest numbers of  
258 mucin-degrading CGGs per genome (**Fig S7**). The genera *Bacteroides* and *Parabacteroides*  
259 contain the majority of strains with the highest number of mucin-degrading CGCs per genome  
260 (**Fig 5B**). Many of the strains that were enriched in humanized mice with PMG supplementation  
261 (unidentified *Bacteroides* spp., *B. ovatus*, *B. caccae*) were identified as strains in the HGM with  
262 the highest numbers of candidate mucin-degrading CGCs (**Fig 5B**). Proteobacteria, which were  
263 suppressed by PMG supplementation (**Fig 3C**) harbor very few mucin-degrading CGCs (**Fig S7**).

264         Prevalent human commensal bacteria show a greater diversity and abundance of mucus-  
265 degrading CGCs than well-known enteric pathogens. Of the 34 species within the HGM database  
266 that we identified as enteric pathogens (please see Materials and Methods section and **Table S3**),  
267 only 4 met our criteria for harboring a candidate mucin CGC (*Vibrio vulnificus*, *Clostridium*  
268 *botulinum*, *Clostridium paraputrificum*, *Clostridium perfringens*), as opposed to 835 gut  
269 commensals. Of these, 299 strains are also prevalent (> 10%) in a healthy human cohort; only 3  
270 are pathogens (**Fig 5A**). Taken together these results show that mucus utilization is enriched in  
271 commensal, gut-associated bacteria and not common enteric pathogens, consistent with mucus as  
272 a key component of the symbiosis between host and microbiota within the gut.

273

274 **Discussion**

275 During the first months of life, delivery of glycans through breastmilk is an influential force that  
276 shapes the gut microbiota of newborns and infants. It has been suggested that HMOs are  
277 involved in healthy brain and body development[12, 42], immune system maturation[13, 16],  
278 and protection against pathogens[14, 15, 17, 18]. Only small amounts of intact HMOs are found  
279 in the feces and urine of breast-fed infants[43], suggesting that most HMOs are hydrolyzed by  
280 neonate gut commensals[44]. Our experiments comparing gnotobiotic and GF mice support this  
281 hypothesis, and our results demonstrate that the gut microbial community indeed metabolizes  
282 HMOs. Furthermore, selective consumption of exogenous glycans can influence the composition  
283 of microbes present in the gut, favoring microorganisms with a high diversity of carbohydrate-  
284 active enzymes (e.g., *Bt*[5]) or with particular hydrolase activity to cleave certain glycan linkages  
285 (e.g., *B. infantis*[22]). The metabolic flexibility of polysaccharide generalists such as *Bt* may  
286 confer a competitive advantage during the transition from infancy to adulthood, as it may shift its  
287 metabolism from HMOs to dietary or mucin glycans[24].

288 The pool of HMOs found in breastfeeding mothers varies in composition, structure and  
289 concentration day to day. When searching for molecules that aim to mimic the effect of HMOs  
290 on the gut microbiota, for example, in order to create an ideal infant feeding formula, similar  
291 structural complexity should be one of the major considerations. Our chromatographic mass-  
292 spectrometry analysis indicates that PMGs are a good candidate to mimic the complexity of  
293 HMOs. *In vivo* experiments with humanized mice indicate that PMGs and HMOs affect the  
294 microbiota in nuanced ways; the complex glycan mixtures structure the microbiota similarly at  
295 high-level ecological and taxonomic scales. A notably similar change due to supplementation  
296 with either glycan is an increase in the relative abundance of the species *A. muciniphila*, which  
297 relies on mucin as a carbon and nitrogen source, producing short chain fatty acids from mucin

298 fermentation[45]. Several studies in humans and animal models have documented the presence  
299 of *Akkermansia* with various positive phenotypes for the host. Studies in pregnant women have  
300 shown *A. muciniphila*-like bacteria to be positively correlated with normal weight gain over  
301 pregnancy[46] and reduction of diabetes[38]. In addition, *Akkermansia* levels have been  
302 inversely related to the severity of obesity[47] and inflammatory bowel disease[48]. Colonization  
303 of obese mice with *A. muciniphila* reduces body weight without dietary change and reverse diet-  
304 induced fasting hyperglycemia and insulin resistance index, reducing adipose tissue[40].  
305 Notably, recent studies have associated *A. muciniphila* with positive responses to  
306 immunotherapy in cancer patients[49] and maintenance of intestinal adaptive immune responses  
307 during homeostasis[50]. Studies demonstrating an enrichment of Verrucomicrobia in  
308 industrialized compared to traditional populations [51] and blooming in mice fed a fiber-poor  
309 diet coincident with inflammatory markers[1, 25] suggests that context, quantification of  
310 absolute abundance, and perhaps function and strain-specific features of *Akkermansia* may be  
311 important considerations in overall health impact of this taxon within an individual.

312         The broad spectrum of glycan structures present in breast milk may represent an  
313 ecological strategy in which a robust gut ecosystem is selected for via maternal transmission of  
314 microbes supported by HMOs. By delivering a diverse pool of glycans, the mother facilitates  
315 establishment of a microbial community that may be more stable than one which relies primarily  
316 on limited structural diversity (i.e., a single type of glycan) or on fluctuating dietary input from  
317 the host. The HMO-consuming community can utilize structurally similar mucins; we show here  
318 that bacteria prevalent in healthy humans possess a diverse array of glycoside hydrolases capable  
319 of mucin glycan degradation. The manner by which the complex chemistries of exogenously-  
320 administered PMGs influence the microbial community in the background of endogenous human

321 mucus glycans versus murine mucus glycans is an important area of follow-up investigation.  
322 Previous work has demonstrated detrimental effects of microbial degradation of the host mucus  
323 layer[1, 25]; exogenously-provided mucus glycans may reduce the consumption of the host  
324 mucus in the absence of dietary MACs. The findings presented here support the idea that the host  
325 selects for a mucin-consuming microbial community to promote stability in the gut ecosystem.  
326 Accordingly, three diverse types of disturbance to the microbial community of humanized mice  
327 were mitigated by administration of exogenous PMGs. The close symbiotic interactions between  
328 commensals and their host appear to evolve at the mucus interface, with HMOs serving as  
329 important agents of this relationship after birth.

330

### 331 **Materials and Methods**

332 ***HMO isolation from human milk.*** Human milk was obtained from 12 healthy volunteers  
333 recruited at the UCSD Medical Center, San Diego, CA, after approval by the University's  
334 Institute Review Board. Proteins and lipids were removed from milk samples with centrifugation  
335 and ethanol precipitation. Roto-evaporation was used to rid samples of residual ethanol. Lactose  
336 and salts were removed by gel filtration chromatography over a BioRad P2 column (100 cm x 16  
337 mm, Bio-Rad, Hercules, CA. USA) using a semi-automated Fast Protein Liquid Chromatography  
338 (FPLC) system.

339 ***HMO isolation and purification from animal specimens.*** HMOs were extracted from mouse  
340 ileum and feces, purified over C18 and CarboGraph microcolumns, fluorescently labeled with 2-  
341 aminobenzamide (2AB) and separated by high performance liquid chromatography (HPLC) on  
342 an amide-80 column (4.6mm ID x 25cm, 5 µm, Tosoh Bioscience, Tokyo) with a 50 mM  
343 ammonium formate/acetonitrile buffer system. Separation was monitored by a fluorescence



344 detector at 360 nm excitation and 425 nm emission. Peak annotation was based on standard  
345 retention times and mass spectrometric (MS) analysis on a Thermo LCQ Duo Ion trap mass  
346 spectrometer equipped with a Nano-ESI-source.

347 ***HMO Profiling by High Performance Liquid Chromatography with Fluorescence Detection***  
348 ***(HPLC-FL)***. Isolated, dried HMOs from intestinal samples were fluorescently labeled with 2-  
349 aminobenzamide (2AB) and cleaned with silica spin columns as previously described. The 2AB-  
350 glycans were separated by HPLC-FL on an amide-80 column (4.6mm ID x 25cm, 5 mm, Tosoh  
351 Bioscience, Tokyo) with a linear gradient of a 50 mM ammonium formate/acetonitrile buffer  
352 system. Separation was performed at 25° C and monitored by a fluorescence detector at 360 nm  
353 excitation and 425 nm emission.

354 ***Competitive colonization of gnotobiotic mouse.*** Germ-free Swiss-Webster mice were reared in  
355 gnotobiotic isolators and fed an autoclaved polysaccharide-deficient diet (BioServ, [http://bio-](http://bio-serv.com)  
356 [serv.com](http://bio-serv.com)) in accordance with A-PLAC, the Stanford IACUC. Mice were bi-colonized with  
357 overnight cultures of *Bt* and *B. infantis* using oral gavage as described in [5]. Subsequent  
358 community enumerations from mice were determined from freshly collected feces, by selective  
359 plating of serial dilutions on Reinforced Clostridial Media (RCM) agar and Brain-Heart Infusion  
360 (BHI)-blood agar supplemented with gentamicin (200 µg/ml). Significant differences between  
361 sample groups were determined using Student's t-test.

362 ***LNT and LNnT synthesis.*** Synthetic LNT and LNnT (Glycom A/S) were crystallized to a final  
363 purity of >99%. Characterization was performed using multiple methods including NMR (1D  
364 and 2D) mass-spectrometry, and HPLC.

365 ***PMGs preparation.*** PMGs were prepared as described by Martens *et al*[30], with some  
366 modifications: *O*-glycans were released from porcine gastric mucin (Sigma Type III, 10% w/v)

367 by incubation at 48°C for 20 hrs in 150 mM NaOH with 750 mM NaBH<sub>4</sub>. The reaction was  
368 neutralized with HCl (10 M). Insoluble material was removed by centrifugation at 14000 x g (30  
369 mins, 4° C). Supernatant was filtered and dialyzed against dH<sub>2</sub>O with 1kD MWCO membranes  
370 (Spectra/Por 7, Spectrum Labs)) and subsequently lyophilized. Glycans were solubilized in  
371 50mM Tris pH 7.4 buffer and fractionated using DEAE-Sepharose CL-6B anion exchange  
372 columns.

373 ***Monosaccharide and sialic acid determination from PMGs.*** For monosaccharide composition  
374 analysis, PMG samples were hydrolyzed using 2 M trifluoroacetic acid (TFA) at 100°C for 4 h  
375 followed by removal of the acid under dry nitrogen flush. Dried samples were co-evaporated  
376 with 50 µl aqueous iso-propyl solution (50% IPA) twice to ensure complete removal of TFA.  
377 Finally, samples were dissolved in water and analyzed by HPAEC-PAD (Dionex ICS3000) using  
378 a CarboPac PA-1 (4x250mm0 column with 100mM NaOH and 250mM NaOAc.  
379 Monosaccharides were identified with a sensitive post-acceleration detector (PAD) using  
380 standard Quad potential as specified by the manufacturer.

381 Sialic acid content of PMGs was determined after hydrolysis with 2M HOAc at 80° C for  
382 3 hours. Acetic acid was removed by speed vacuum and free sialic acids collected by spin-  
383 filtration through a 3k MWCO filter followed by derivatization with 1,2-diamino-4,5-  
384 methyleneoxybenzene (DMB). Fluorescently-labeled sialic acids were analyzed by reverse-phase  
385 HPLC using Acclaim120 C18 column (4 X 250mm, 5µ, Dionex) and a fluorescence detector  
386 with a slow gradient of 9% to 14% acetonitrile over 20 min.

387 ***MALDI-mass spectrometry method for PMG structural analysis.*** Samples were prepared for  
388 MALDI-mass spectrometry with slight modifications to an established method[52]. To per-*O*-  
389 methylate, PMG samples were dissolved in dry DMSO, to which 100 µl sodium hydroxide in

390 DMSO was added, followed by immediate addition of 200  $\mu$ L methyl iodide. After continuous  
391 stirring for 1 h, a second aliquot of methyl iodide (50  $\mu$ L) was added, followed by stirring for 30  
392 min. The reaction was stopped with ice-cold water and the permethylated glycans were extracted  
393 with 1 mL chloroform. The chloroform layer was washed twice with water, dried, re-suspended  
394 in methanol, mixed with sDHB matrix and spotted on a MALDI plate. Spectra were acquired on  
395 positive mode, and putative glycan structures were assigned with Glyco Workbench[53, 54].

396 ***Mouse humanization and enumeration.*** Germ-free Swiss-Webster mice were humanized once  
397 with 200  $\mu$ l of frozen human fecal sample resuspended 1:1 in anaerobic phosphate buffer saline  
398 (PBS) by oral gavage. The same adult human donor sample was used for all humanization  
399 experiments. The humanized microbiota was allowed to equilibrate for 4-6 weeks prior to onset  
400 of experimental manipulation. Mice were maintained in gnotobiotic isolators throughout the  
401 duration of the experiments and fed one of three diets: standard (Purina LabDiet 5K67),  
402 polysaccharide-deficient (BioServ, <http://bio-serv.com>) or high fat (60% fat and 20%  
403 carbohydrates, D12492, Research Diets Inc.). When needed, 1 mg of clindamycin (Sigma) per  
404 mouse was administered via oral gavage or 200  $\mu$ l of an overnight culture of *C. difficile* growth  
405 in RCM (BD Difco). To approximate the mass of HMOs available to breastfeeding infants,  
406 complex pools of glycans (purified HMOs and PMGs) were added at a concentration of 1%  
407 (w/v) in water unless otherwise specified. Infants consume approximately 7.5-11.25 g HMOs  
408 daily (~750 mL milk intake, HMOs are 10-15 mg/mL in breastmilk), 1.5-2.25 g/kg (for a 5 kg  
409 infant). Mice consume about 5 mL water per day; at 10 mg/mL glycan concentration, this  
410 equates to 2 g/kg for a 25 g mouse. LNT and LNnT together constitute 15-20% total HMOs in  
411 breastmilk[8]; as such, administration of pure glycans (LNT, LNnT) are provided at a higher

412 concentration than at which they naturally occur. All animal protocols were in accordance with  
413 A-PLAC, the Stanford IACUC.

414 **C. difficile enumeration.** For quantification of *C. difficile* CFU, 1 µl feces was serially diluted in  
415 PBS and plated onto selective media, composed of Clostridium difficile Agar Base (Oxoid) with  
416 7% v/v of Defibrinated Horse Blood (Lampire Biological Laboratories), supplemented with 32  
417 mg/L Moxalactam (Santa Cruz Biotechnology) and 12 mg/L Norfloxacin (Sigma-Aldrich)  
418 (CDMN). Plates were incubated overnight at 37° C in an anaerobic chamber (Coy). Identification  
419 of colonies as *C. difficile* was validated by colony PCR, using the primers C11 (5'-  
420 TGTTGCAATATTGGATGCTTT) and C12 (5'-TGACCTCCAATCCAAACAAA), which target  
421 a fragment of *tcdB* gene.

422 **16S rRNA amplicon sequencing and analysis.** Fresh fecal samples were collected and frozen at  
423 -80° C. DNA was extracted according to Earth Microbiome Project standard protocols using the  
424 Powersoil-htp extraction kit (MoBio). The 16S rRNA gene was amplified (515F, 806R) and  
425 sequenced using the Illumina MiSeq platform at the Medical Genome Facility, Mayo Clinic,  
426 Rochester, MN across 6 runs at 150 bp except the experiments with HFD, where 300 bp (Figures  
427 4A,B,E,F,G) and 250 bp (Figures 4C,4D,S6) were generated. Raw reads were demultiplexed  
428 using QIIME 1.9[55] and subsequently trimmed and denoised using DADA2 with standard input  
429 parameters maxN=0, maxEE=2, trunQ=2 except for the GOS/HMO/PMG supplementation  
430 experiment (corresponding to Figures 1C,1D,S3) where maxEE=(5,2) was used[56]. Taxonomy  
431 was assigned with the GreenGenes training set version 13.8 clustered at 97% identity.

432 Phylogenetic trees were constructed by performing a multiple sequence alignment and  
433 constructing a Generalized time-reversible with Gamma rate variation maximum likelihood tree  
434 using a neighbor-joining tree as a starting point with the R packages *msa* and *phangorn* as

435 described previously[57]. All resulting datasets were filtered for low-abundance ASVs at 10%  
436 prevalence and subsequently rarefied. R packages *phyloseq*, *DESeq2*, *RandomForests*, *rfUtilities*,  
437 *vegan*, *caret*, *cluster*, *harrietr*, *ggpubr*, *plotrix*, *rstatix* and *ggplot2* were used for normalization,  
438 analyses, and visualization.

439 ***Mining for mucin carbohydrate gene clusters in silico.*** Four thousand five hundred and fifty  
440 eight fully sequenced genomes were selected based on their identification as being human-  
441 associated (n=4558, in the Human Gut MAG Species Database, HGMdb;  
442 <https://github.com/snayfach/IGGdb>)[41]. Carbohydrate-active enzyme assignment of glycoside  
443 hydrolases (GHs) was performed using a Hidden Markov Model database[58, 59]. We identified  
444 physically linked carbohydrate gene clusters (CGCs) using a default stringent parameter in the  
445 dbCaN software, which defines a CGC as physical linkage (distance  $\leq 2$ ) of at least two  
446 CAZymes with a transcription factor (TF) or transporter (TC); in this case CAZymes were  
447 constrained to those listed in **Table S2**. GHs within CGCs were summed across each genome,  
448 and heat maps were generated using CGC counts. Prevalence of taxa across individuals was  
449 determined by running the IGGSearch software [41] with default settings on the 180  
450 metagenomes available from healthy individuals in the HMP (<https://hmpdacc.org/>). Taxa were  
451 defined as pathogenic if they met the criteria of belonging to a list of genera  
452 (*Salmonella*, *Shigella*, *Yersinia*, *Vibrio*, *Campylobacter*) or species (*Clostridium difficile*,  
453 *Clostridium perfringens*, *Clostridium botulinum*, *Pseudomonas Aeruginosa*), and could be  
454 manually verified as pathogens based on existing literature (see **Table S3** for a list of these 34  
455 species).

456 **Body composition analysis.** Animals were measured for total body fat mass and adipose deposits  
457 were precisely dissected and weighted. Short chain fatty acid content was determined as  
458 described previously[60].

459

460 **Data Availability.** All raw 16S sequencing data will be made publicly available. Code will be  
461 made available upon request.

462

463 **Acknowledgements.** We thank members of the Sonnenburg Lab for helpful discussions. We  
464 thank the UCSD Glycotechnology Core Facility for technical assistance and Glycom for their  
465 generous contribution of LNT and LNnT. Evelyn Jantscher-Krenn and Alex Szyszka at the  
466 Division of Neonatology and Division of Gastroenterology and Nutrition, Department of  
467 Pediatrics, UCSD, provided technical support for the HMO isolation. The authors acknowledge  
468 support from the National Institutes of Health R01-DK085025 (to J.L.S.). J.L.S. is a Chan  
469 Zuckerberg Biohub Investigator.

470

471 **Competing Interests.** Pruss K.M., Marcobal A., Southwick A.M., Dahan D., Smits S.A.,  
472 Higginbottom S., Sonnenburg E., Kashyap P., Choudhury B., Bode L., no conflicts of interest. J.  
473 Ferreyra is a scientist at NGM Biopharmaceuticals. J. L. Sonnenburg is a founder of Novome  
474 Biotechnologies, Inc., January. ai, and a scientific advisor for Second Genome and Gnubiotics,  
475 who has licensed intellectual property related to this manuscript.

476

## References

477

478 1. Earle KA, Billings G, Sigal M, Lichtman JS, Hansson GC, Elias JE, et al. Quantitative

- 479 Imaging of Gut Microbiota Spatial Organization. *Cell Host Microbe* 2015; **18**: 478–488.
- 480 2. Sonnenburg JL, Xu J, Leip DD, Chen C-H, Westover BP, Weatherford J, et al. Glycan  
481 foraging in vivo by an intestine-adapted bacterial symbiont. *Science* 2005; **307**: 1955–  
482 1959.
- 483 3. Koropatkin NM, Cameron EA, Martens EC. How glycan metabolism shapes the human  
484 gut microbiota. *Nat Rev Microbiol* 2012; **10**: 323–335.
- 485 4. Marcobal A, Southwick AM, Earle KA, Sonnenburg JL. A refined palate: Bacterial  
486 consumption of host glycans in the gut. *Glycobiology* 2013; **23**: 1038–1046.
- 487 5. Marcobal A, Barboza M, Sonnenburg ED, Pudlo N, Martens EC, Desai P, et al.  
488 Bacteroides in the infant gut consume milk oligosaccharides via mucus-utilization  
489 pathways. *Cell Host Microbe* 2011; **10**: 507–514.
- 490 6. Bode L. Human milk oligosaccharides: Every baby needs a sugar mama. *Glycobiology*  
491 2012; **22**: 1147–1162.
- 492 7. Wu S, Salcedo J, Tang N, Waddell K, Grimm R, German JB, et al. Employment of  
493 tandem mass spectrometry for the accurate and specific identification of oligosaccharide  
494 structures. *Anal Chem* 2012; **84**: 7456–7462.
- 495 8. Kunz C, Rudloff S, Baier W, Klein N, Strobel S. Oligosaccharides in Human Milk:  
496 Structural, Functional, and Metabolic Aspects. *Annu Rev Nutr* 2000; **20**: 699–722.
- 497 9. Gabrielli O, Zampini L, Galeazzi T, Padella L, Santoro L, Peila C, et al. Preterm Milk  
498 Oligosaccharides During the First Month of Lactation. *Pediatrics* 2011; **128**: e1520–  
499 e1531.
- 500 10. Bao Y, Zhu L, Newburg DS. Simultaneous quantification of sialyloligosaccharides from  
501 human milk by capillary electrophoresis. *Anal Biochem* 2007; **370**: 206–214.
- 502 11. Coppa G V, Pierani P, Zampini L, Carloni I, Carlucci A, Gabrielli O. Oligosaccharides in  
503 human milk during different phases of lactation. *Acta Paediatr Suppl* 1999; **88**: 89–94.
- 504 12. Wang B. Molecular Mechanism Underlying Sialic Acid as an Essential Nutrient for Brain  
505 Development and Cognition. *Adv Nutr* 2012; **3**: 465S–472S.
- 506 13. Eiwegger T, Stahl B, Haidl P, Schmitt J, Boehm G, Dehlink E, et al. Prebiotic  
507 oligosaccharides: In vitro evidence for gastrointestinal epithelial transfer and  
508 immunomodulatory properties. *Pediatr Allergy Immunol* 2010; **21**: 1179–1188.
- 509 14. Morrow AL, Ruiz-Palacios GM, Jiang X, Newburg DS. Human-Milk Glycans That  
510 Inhibit Pathogen Binding Protect Breast-feeding Infants against Infectious Diarrhea. *J*  
511 *Nutr* 2005; **135**: 1304–1307.
- 512 15. Ruiz-Palacios GM, Cervantes LE, Ramos P, Chavez-Munguia B, Newburg DS.  
513 *Campylobacter jejuni* binds intestinal H(O) antigen (Fuca1, 2Galβ1, 4GlcNAc), and  
514 fucosyloligosaccharides of human milk inhibit its binding and infection. *J Biol Chem*  
515 2003; **278**: 14112–14120.
- 516 16. Triantis V, Bode L, van Neerven RJJ. Immunological Effects of Human Milk  
517 Oligosaccharides. *Front Pediatr* 2018; **6**: 1–14.
- 518 17. Porcelli P, Schanler R, Greer F, Chan G, Gross S, Mehta N, et al. Growth in Human Milk-  
519 Fed Very Low Birth Weight Infants Receiving a New Human Milk Fortifier. *Ann Nutr*  
520 *Metab* 2000; **44**: 2–10.
- 521 18. Sisk PM, Lovelady CA, Dillard RG, Gruber KJ, O’Shea TM. Early human milk feeding is  
522 associated with a lower risk of necrotizing enterocolitis in very low birth weight infants. *J*  
523 *Perinatol* 2007; **27**: 428–433.
- 524 19. Lauwaet T, Bliss LA, Bode L, Gillin FD, Reed SL, Jantscher-Krenn E. Human milk

- 525 oligosaccharides reduce *Entamoeba histolytica* attachment and cytotoxicity in vitro. *Br J*  
526 *Nutr* 2012; **108**: 1839–1846.
- 527 20. Charbonneau MR. Sialylated milk oligosaccharides promote microbiota-dependent growth  
528 in models of infant undernutrition. *Cell* 2016; **164**: 859–871.
- 529 21. Jantscher-Krenn E, Marx C, Bode L. Human milk oligosaccharides are differentially  
530 metabolised in neonatal rats. *Br J Nutr* 2013; **110**: 640–650.
- 531 22. Sela DA, Chapman J, Adeuya A, Kim JH, Chen F, Whitehead TR, et al. The genome  
532 sequence of *Bifidobacterium longum* subsp. *infantis* reveals adaptations for milk  
533 utilization within the infant microbiome. *Proc Natl Acad Sci* 2008; **105**: 18964–18969.
- 534 23. Kim J-H, Henrissat B, Bottacini F, Turrone F, Mills D, Kelly D, et al. Genome analysis of  
535 *Bifidobacterium bifidum* PRL2010 reveals metabolic pathways for host-derived glycan  
536 foraging. *Proc Natl Acad Sci* 2010; **107**: 19514–19519.
- 537 24. Vatanen T, Franzosa EA, Schwager R, Tripathi S, Arthur TD, Vehik K, et al. The human  
538 gut microbiome in early-onset type 1 diabetes from the TEDDY study. *Nature* 2018; **562**:  
539 589–594.
- 540 25. Desai MS, Seekatz AM, Koropatkin NM, Kamada N, Hickey CA, Wolter M, et al. A  
541 Dietary Fiber-Deprived Gut Microbiota Degrades the Colonic Mucus Barrier and  
542 Enhances Pathogen Susceptibility. *Cell* 2016; **167**: 1339–1353.
- 543 26. Turnbaugh PJ, Ridaura VK, Faith JJ, Rey FE, Knight R, Gordon JI. The Effect of Diet on  
544 the Human Gut Microbiome: A Metagenomic Analysis in Humanized Gnotobiotic Mice.  
545 *Sci Transl Med* 2009; **1**: 6ra14:1-10.
- 546 27. Marcobal A, Kashyap PC, Nelson TA, Aronov PA, Donia MS, Spormann A, et al. A  
547 metabolomic view of how the human gut microbiota impacts the host metabolome using  
548 humanized and gnotobiotic mice. *ISME J* 2013; **7**: 1933–43.
- 549 28. Marcobal A, Barboza M, Froehlich JW, Block DE, German JB, Lebrilla CB, et al.  
550 Consumption of Human Milk Oligosaccharides by Gut-Related Microbes. *J Agric Food*  
551 *Chem* 2010; **58**: 5334–5340.
- 552 29. Weiss S, Xu ZZ, Peddada S, Amir A, Bittinger K, Gonzalez A, et al. Normalization and  
553 microbial differential abundance strategies depend upon data characteristics. *Microbiome*  
554 2017; **5**: 27.
- 555 30. Martens EC, Chiang HC, Gordon JI. Mucosal Glycan Foraging Enhances Fitness and  
556 Transmission of a Saccharolytic Human Gut Bacterial Symbiont. *Cell Host Microbe* 2008;  
557 **4**: 447–457.
- 558 31. Jin C, Kenny DT, Skoog EC, Padra M, Adamczyk B, Vitzeva V, et al. Structural diversity  
559 of human gastric mucin glycans. *Mol Cell Proteomics* 2017; 743–758.
- 560 32. Tibshirani R, Walther G, Hastie T. Estimating the number of clusters in a data set via the  
561 gap statistic. *J R Stat Soc Ser B Stat Methodol* 2001; **63**: 411–423.
- 562 33. Litvak Y, Byndloss MX, Bäumlner AJ. Colonocyte metabolism shapes the gut microbiota.  
563 *Science* 2018; **362**: eaat9076.
- 564 34. Byndloss MX, Olsan EE, Rivera-Chavez F, Tiffany CR, Cevallos SA, Lokken KL, et al.  
565 Mictobiota-activated PPAR-gamma signaling inhibits dysbiotic *Enterobacteriaceae*  
566 expansion. *Science* 2017; **357**: 570–575.
- 567 35. Theriot CM, Koenigsnecht MJ, Carlson PE, Hatton GE, Nelson AM, Li B, et al.  
568 Antibiotic-induced shifts in the mouse gut microbiome and metabolome increase  
569 susceptibility to *Clostridium difficile* infection. *Nat Commun* 2014; **5**: 3114.
- 570 36. Battaglioli EJ, Hale VL, Chen J, Jeraldo P, Ruiz-Mojica C, Schmidt BA, et al.



- 571 Clostridioides difficile uses amino acids associated with gut microbial dysbiosis in a  
572 subset of patients with diarrhea. *Sci Transl Med* 2018; **10**: eaam7019.
- 573 37. Cherian RM, Jin C, Liu J, Karlsson NG, Holgersson J. Mucin-based *C. difficile* inhibitors  
574 Recombinant mucin-type fusion proteins with Gal $\alpha$ 1,3Gal substitution as *Clostridium*.  
575 2016.
- 576 38. Hansen CHF, Krych L, Nielsen DS, Vogensen FK, Hansen LH, Sørensen SJ, et al. Early  
577 life treatment with vancomycin propagates *Akkermansia muciniphila* and reduces diabetes  
578 incidence in the NOD mouse. *Diabetologia* 2012; **55**: 2285–2294.
- 579 39. Cani PD, de Vos WM. Next-generation beneficial microbes: The case of *Akkermansia*  
580 *muciniphila*. *Front Microbiol* 2017; **8**: 1–8.
- 581 40. Everard A, Belzer C, Geurts L, Ouwerkerk JP, Druart C, Bindels LB, et al. Cross-talk  
582 between *Akkermansia muciniphila* and intestinal epithelium controls diet-induced obesity.  
583 *Proc Natl Acad Sci* 2013; **110**: 9066–9071.
- 584 41. Nayfach S, Shi ZJ, Seshadri R, Pollard KS, Kyrpides NC. New insights from uncultivated  
585 genomes of the global human gut microbiome. *Nature* 2019; **568**: 505–510.
- 586 42. Cowardin CA, Ahern PP, Kung VL, Hibberd MC, Cheng J, Guruge JL, et al. Mechanisms  
587 by which sialylated milk oligosaccharides impact bone biology in a gnotobiotic mouse  
588 model of infant undernutrition. *Proc Natl Acad Sci U S A* 2019; **116**: 11988–11996.
- 589 43. Rudloff S, Pohlentz G, Borsch C, Lentze MJ, Kunz C. Urinary excretion of in vivo <sup>13</sup>C-  
590 labelled milk oligosaccharides in breastfed infants. *Br J Nutr* 2012; **107**: 957–963.
- 591 44. Albrecht S, Schols HA, van Zoeren D, van Lingen RA, Groot Jebbink LJM, van den  
592 Heuvel EGHM, et al. Oligosaccharides in feces of breast- and formula-fed babies.  
593 *Carbohydr Res* 2011; **346**: 2173–2181.
- 594 45. Derrien M, Collado MC, Ben-Amor K, Salminen S, de Vos WM. The Mucin Degradator  
595 *Akkermansia muciniphila* Is an Abundant Resident of the Human Intestinal Tract. *Appl*  
596 *Environ Microbiol* 2007; **74**: 1646–1648.
- 597 46. Santacruz A, Collado MC, García-Valdés L, Segura MT, Marín-Lagos JA, Anjos T, et al.  
598 Gut microbiota composition is associated with body weight, weight gain and biochemical  
599 parameters in pregnant women. *Br J Nutr* 2010; **104**: 83–92.
- 600 47. Karlsson CLJ, Önnarfält J, Xu J, Molin G, Ahrné S, Thorngren-Jerneck K. The microbiota  
601 of the gut in preschool children with normal and excessive body weight. *Obesity* 2012; **20**:  
602 2257–2261.
- 603 48. Png CW, Lindén SK, Gilshenan KS, Zoetendal EG, McSweeney CS, Sly LI, et al.  
604 Mucolytic Bacteria With Increased Prevalence in IBD Mucosa Augment In Vitro  
605 Utilization of Mucin by Other Bacteria. *Am J Gastroenterol* 2010; **105**: 2420–2428.
- 606 49. Routy B, Le Chatelier E, Derosa L, Duong CPM, Alou MT, Daillère R, et al. Gut  
607 microbiome influences efficacy of PD-1-based immunotherapy against epithelial tumors.  
608 *Science* 2018; **359**: 91–97.
- 609 50. Ansaldo E, Slayden LC, Ching KL, Koch MA, Wolf NK, Plichta DR, et al. *Akkermansia*  
610 *muciniphila* induces intestinal adaptive immune responses during homeostasis. *Science*  
611 (80- ) 2019; **364**: 1179–1184.
- 612 51. Smits SA, Leach J, Sonnenburg ED, Gonzalez CG, Lichtman JS, Reid G, et al. Seasonal  
613 Cycling in the Gut Microbiome of the Hadza Hunter-Gatherers of Tanzania. *Science* (80- )  
614 2017; **357**: 802–806.
- 615 52. I C, F K. A Simple and Rapid Method for the Permethylation of Carbohydrates.  
616 *Carbohydr Res* 1984; **131**: 209–217.

- 617 53. Dell A, Ranzinger R, Damerell D, Maass K, Ceroni A, Haslam SM. The GlycanBuilder  
618 and GlycoWorkbench glycoinformatics tools: updates and new developments. *Biol Chem*  
619 2012; **393**: 1357–1362.
- 620 54. Ceroni A, Maass K, Geyer H, Geyer R, Dell A, Haslma SM. GlycoWorkbench: a tool for  
621 the computer-assisted annotation of mass spectra of glycans. *J Proteome Res* 2008; **7**:  
622 1650–1659.
- 623 55. Knights D, Walters WA. Caparose JGKJ , Stombaugh J , Bittinger K , Bushman FD ..  
624 QIIME allows analysis of high- throughput community sequencing data . *Nat Met* 7□:  
625 335-336. *Nat Publ Gr* 2010; **7**: 335–336.
- 626 56. Callahan BJ, McMurdie PJ, Rosen MJ, Han AW, Johnson AJA, Holmes SP. DADA2:  
627 High-resolution sample inference from Illumina amplicon data. *Nat Methods* 2016; **13**:  
628 581–583.
- 629 57. Holmes SP, Sankaran K, Callahan BJ, McMurdie PJ, Fukuyama JA. Bioconductor  
630 Workflow for Microbiome Data Analysis: from raw reads to community analyses.  
631 *F1000Research* 2016; **5**: 1492.
- 632 58. Huang L, Zhang H, Wu P, Entwistle S, Li X, Yohe T, et al. DbCAN-seq: A database of  
633 carbohydrate-active enzyme (CAZyme) sequence and annotation. *Nucleic Acids Res* 2018;  
634 **46**: D516–D521.
- 635 59. Yin Y, Mao X, Yang J, Chen X, Mao F, Xu Y. DbCAN: A web resource for automated  
636 carbohydrate-active enzyme annotation. *Nucleic Acids Res* 2012; **40**: 445–451.
- 637 60. Kashyap PC, Marcobal A, Ursell LK, Larauche M, Duboc H, Earle KA, et al. Complex  
638 Interactions Among Diet, Gastrointestinal Transit, and Gut Microbiota in Humanized  
639 Mice. *Gastroenterology* 2013; **144**: 967–977.
- 640 61. Ndeh D, Gilbert HJ. Biochemistry of complex glycan depolymerisation by the human gut  
641 microbiota. *FEMS Microbiol Rev* 2018; **42**: 146–164.
- 642 62. Tailford LE, Crost EH, Kavanaugh D, Juge N. Mucin glycan foraging in the human gut  
643 microbiome. *Front Genet* 2015; **5**.
- 644 63. Ravcheev DA, Thiele I. Comparative genomic analysis of the human gut microbiome  
645 reveals a broad distribution of metabolic pathways for the degradation of host-synthesized  
646 mucin glycans and utilization of mucin-derived monosaccharides. *Front Genet* 2017; **8**: 1–  
647 22.
- 648 64. Wakinaka T, Kiyohara M, Kurihara S, Hirata A, Chaiwangsri T, Ohnuma T, et al.  
649 Bifidobacterial a-galactosidase with unique carbohydrate-binding module specifically acts  
650 on blood group B antigen. *Glycobiology* 2013; **23**: 232–240.

651  
652

## Figure Legends

653 **Figure 1. Human milk oligosaccharides (HMOs) are consumed by and shape the**  
654 **commensal microbiota. A)** Germ-free and mice bi-colonized with *Bt* and *B. infantis* were fed  
655 MD diet supplemented with 1% HMOs (w/v in water). HPLC-FL based chromatograms of  
656 glycan content in stool samples at day 7 reveal degradation of HMOs *in vivo*. **B)** HMO

657 supplementation provides a competitive advantage to *B. infantis* over *Bt* in bi-colonized mice  
658 (n=4 mice/group, mean +/- SEM, \*\*\* =  $P < 0.001$ ). Abundance of *Bt* and *B. infantis* from feces  
659 was determined with CFU dilution plating. **C)** Bray-Curtis dissimilarity metric indicates  
660 significant differences to community composition between mice on MD diet and MD diet  
661 supplemented with 1% PMGs, or HMOs. MD diet alone is not significantly different from MD  
662 diet supplemented with 1% GOS. (Data were combined across sampling time-points: n=12 MD,  
663 n=19 MD+GOS, n=21 MD+HMOs, n=11 MD+PMG, n=61 MAC<sup>+</sup>, n=10 MAC<sup>+</sup>+PMG. a. \*  
664 MAC<sup>+</sup> vs. MD; \*\*\*\* MAC<sup>+</sup> vs. MD+GOS, MD+HMOs, and MD+PMG. b. \*\*\* MAC<sup>+</sup>+PMG  
665 vs. MD; \*\*\*\* MAC<sup>+</sup>+PMG vs. MD+GOS, MD+HMOs, and MD+PMG. \*\*\*  $P < 0.001$ , \*\*\*\*  $P$   
666  $< 0.0001$ , pairwise t-tests with Bonferroni multiple hypothesis correction). **D)** Individual ASVs  
667 with significantly different abundance due to HMO supplementation (positive log<sub>2</sub>-fold change)  
668 versus MD diet alone (negative log<sub>2</sub>-fold change, mean +/- SEM, adjusted  $P$ -value  $< 0.01$ ,  
669 parametric Wald test). Highest resolution taxonomic assignment indicated to the left.

670 **Figure 2. Structural analysis of porcine mucin glycans (PMGs).** **A)** Six detectable  
671 monosaccharides were identified after total acid hydrolysis of PMGs, with four monosaccharides  
672 associated with mucin glycans dominating. Amino sugars are the N-acetyl forms. **B)** 13 abundant  
673 *O*-linked glycans were detected in purified PMGs using MALDI-TOF mass spectrometry. **C,D)**  
674 Structures of the *O*-glycans quantified in **(B)** were predicted with GlycoWork Bench. Three of  
675 the identified PMGs **(C)** were validated with MS/MS.

676 **Figure 3. Treatment with PMGs leads to accelerated post-antibiotic recovery.** **A)** MD diet  
677 supplemented with 1% PMGs (+PMG) leads to accelerated recovery of alpha diversity compared  
678 to MD diet alone (Control, mean +/- SEM shown, \*\*  $P < 0.01$ , \*\*\*\*  $P < 0.0001$ , pairwise t-tests  
679 with Bonferroni correction for post-antibiotic treatment timepoints) Baseline alpha diversity

680 measurements are during MAC<sup>+</sup> diet prior to clindamycin treatment. **B)** Unweighted UniFrac  
681 distance (compared to pre-antibiotic MAC<sup>+</sup> baseline) reveals that PMG supplementation to MD  
682 diet (+PMG) leads to a faster trajectory back to baseline community than MD diet alone  
683 (Control, \*\*\*\*  $P < 0.0001$ , pairwise t-tests with Bonferroni correction). **C)** Mean relative  
684 abundance (%) of the phylum Proteobacteria is suppressed in mice treated with 1% PMGs  
685 compared to the MD control. Bars are colored by genus. Total Proteobacteria abundance is  
686 significantly higher days 7 and 14 post-antibiotic treatment in the control group. (\*  $P < 0.05$ ,  
687 pairwise t-tests with Bonferroni correction). **D)** Relative abundance of *Cd* is suppressed with  
688 PMG supplementation compared to MD diet alone (\*  $P < 0.05$ , \*\*  $P < 0.01$ , pairwise t-tests with  
689 Bonferroni correction).

690 **Figure 4. PMGs mitigate the effect of high-fat diet on host physiology and the gut**

691 **microbiota.** **A)** Weight gain in individual mice fed HFD (n=5 mice, blue), HFD supplemented  
692 continuously with 1% PMGs (n=5, red), or maintained on MAC<sup>+</sup> diet (n=4, red). Weight was  
693 compared to baseline day 0 prior to diet switch (mean +/- SEM, repeated measures two-way  
694 ANOVA with Dunnett's multiple comparison's test, \* indicates significance versus MAC<sup>+</sup>). **B)**  
695 Fat pads as percent total body mass at day 21 (mean +/- SEM, ANOVA). **C)** PMGs administered  
696 for 7-day durations in water (1% w/v) are sufficient to reduce host weight gain (**C**) and fat  
697 accumulation (**D**) due to HFD. **C)** Weight gain compared to day 0 (mean +/- SEM, n = 5  
698 mice/group, multiple t-tests). Red boxes denote period of two one-week pulses of PMGs  
699 administered to HFD + PMG group. **D)** Fat pads as percent total body mass at day 35 (mean +/-  
700 SEM, n = 5 mice/group). **E)** Unweighted UniFrac reveals separation of the three diet groups;  
701 PMG supplementation to HFD leads to a unique microbial community from HFD alone. **F)** Diet-  
702 dependent decreases in cecal short-chain fatty acids were determined by GC-MS in cecal

703 contents of mice fed MAC<sup>+</sup>, HFD, or HFD + 1% PMG. **G)** Changes in the top 100 most  
704 abundant taxa over time for mice maintained on MAC<sup>+</sup>, HFD, or HFD supplemented with 1%  
705 PMGs. f\_\_ indicates that a strain is not assigned at the family level in the Greengenes database;  
706 NA indicates lack of taxonomic assignment at the family level. For A-D,F: \*  $P < 0.05$ , \*\*  $P <$   
707  $0.01$ , \*\*\*  $P < 0.001$ , \*\*\*\*  $P < 0.0001$ .

708 **Figure 5. Prevalent gut commensals harbor high numbers of mucin-degrading**  
709 **carbohydrate gene clusters.** **A)** Numbers of putative mucin-degrading CGCs per genome in  
710 839 taxa that met criteria for at least 1 mucin-degrading CGC and 10% prevalence in healthy  
711 humans. A healthy cohort from the Human Microbiome Project (HMP) dataset is used to define  
712 prevalence. Stars indicate the pathogenic strains queried that contained putative mucin CGCs. **B)**  
713 The top 50 taxa within the HGM database harboring the highest number of mucin-degrading  
714 CGCs within their genomes. Total putative mucin-targeting glycoside hydrolases identified  
715 within these candidate mucin CGCs are indicated (GH sum).

716 **Figure S1. Corresponds to Figure 1.** **A)** HPLC-FL based chromatograms of glycan content in  
717 cecal contents of germ-free or bi-colonized mice fed 1% HMOs in drinking water. At day 7,  
718 mice bi-colonized with *Bt* and *B. infantis* degrade the HMOs still visibly present in germ-free  
719 mice. **B)** Glycan content from germ-free and bi-colonized control (*BtBi* = *B. theta*, *B. infantis*)  
720 mice not fed HMOs. **C-E)** Supplementation with two synthetic HMOs that differ in a single  
721 glycosidic linkage affects the composition of the gut microbiota. **C)** Structure of LNT and LNnT,  
722 two synthetic HMOs. Green circles indicate the differing location of the Gal-Glc linkage. **D)**  
723 Bray-Curtis distance reveals full separation of microbial communities of mice on MAC<sup>+</sup> diet  
724 from MD supplemented with either synthetic HMO, as well as separation of LNT from LNnT  
725 ( $F_{(2,29)}=41.736$  \*  $P < 0.05$ , \*\*\*\*  $P < 0.0001$ , one-way ANOVA with Tukey's post-hoc

726 comparisons). **E)** Relative abundance of bacterial families in MAC<sup>+</sup> or MD supplemented with  
727 LNnT or LNT. f\_\_ indicates that a strain is not assigned at the family level in the Greengenes  
728 database; NA indicates lack of taxonomic assignment at the family level.

729 **Figure S2. Corresponds to Figure 2.** Verification with MS/MS fragmentation pattern of the  
730 three porcine mucin glycan structures predicted by GlycoWork Bench from Fig 2C.

731 **Figure S3. Corresponds to Figure 1. A).** Diet-induced changes to the relative abundance of  
732 bacterial families over time. All mice began on MAC<sup>+</sup> baseline diet days prior to glycan  
733 supplementation. f\_\_ indicates that a strain is not assigned at the family level in the Greengenes  
734 database; NA indicates lack of taxonomic assignment at the family level. **B)** There are no  
735 differences in two alpha diversity metrics between groups on MD dietary background; however,  
736 1% PMG supplementation to MAC<sup>+</sup> diet results in significant alpha diversity enrichment  
737 compared to MAC<sup>+</sup> alone. Observed ASVs and Shannon index are higher in MAC<sup>+</sup> +/- PMGs  
738 than MD supplemented with various glycans (observed ASVs:  $F_{(5,128)}=17.382$ ,  $P < 0.0001$  one-  
739 way ANOVA with tukey's post-hoc comparisons. a. \* MAC<sup>+</sup> vs. MD+GOS, \*\*\*\* MAC<sup>+</sup> vs  
740 MD+HMOs, \*\*\* MAC<sup>+</sup> vs. MD+PMG, \*\*\* MAC<sup>+</sup> vs MAC<sup>+</sup>+PMG. Shannon diversity:  
741  $F_{(5,34.74)}=20.83$ ,  $P < 0.0001$  Welch's ANOVA with Games-Howell post-hoc comparisons. b,  
742 \*\*\*\* MAC<sup>+</sup>+PMG vs. MD, MD+GOS, MD+HMOs, and MD+PMG.) **C)** More dilute PMG  
743 supplementation (0.3%) still leads to significant enrichment of alpha diversity to MAC<sup>+</sup> diet (\*\*\*)  
744  $P < 0.001$ , Student's t-test). **D)** 1% PMG supplementation (positive log<sub>2</sub>-fold change) to MD diet  
745 (negative log<sub>2</sub>-fold change) led to significant enrichment of several taxa that were also enriched  
746 by HMOs (mean +/- SEM, Wald Test, adjusted  $P$  value  $< 0.05$ ). **E)** 0.3% PMG supplementation  
747 to MAC<sup>+</sup> diet (as in S3C) led to enrichment of three *Bacteroides* species (mean +/- SEM, Wald  
748 Test, adjusted  $P$  value  $< 0.01$ ).

749 **Figure S4. Corresponds to Figure 3. A)** Relative abundance of bacterial families after  
750 clindamycin treatment. f\_\_ indicates that a strain is not assigned at the family level in the  
751 Greengenes database; NA indicates lack of taxonomic assignment at the family level. **B.** PMGs  
752 supplemented to MD diet lead to enhanced recovery of *A. muciniphila* (Pairwise t-tests with  
753 Bonferroni correction, \*  $P < 0.05$ , \*\*\*  $P < 0.001$ ).

754 **Figure S5. Corresponds to Figure 3. A)** Absolute abundance of *Cd* colonization enumerated  
755 with selective plating is reduced with PMG administration days 6 and 7 post-infection compared  
756 to unsupplemented control (MD diet, \*  $P < 0.01$ , Student's t-test). **B)** Relative abundance of *Cd*  
757 is not affected by PMGs in a MAC<sup>+</sup> background. **C)** Blinded histopathological scoring of cecal  
758 (i.) and distal colon (ii.) tissues from mice infected with *Cd*.

759 **Figure S6. Corresponds to Figure 4. A)** PMG supplementation to HFD leads to distinct  
760 communities from HFD alone or MAC<sup>+</sup> diet as quantified by the first principal component of  
761 unweighted UniFrac distance between communities ( $F_{(2,107)}=782.603$  \*\*\*\*  $P < 0.0001$  ANOVA  
762 with Tukey's post-hoc comparisons. n=30 HFD, n=29 HFD+PMG, n=51 MAC<sup>+</sup>). **B)** Relative  
763 abundance of the top 100 most abundant taxa on HFD alone or HFD with transient (1 week)  
764 PMG supplementation. Salmon-colored background boxes indicate sampling timepoints during  
765 which 1% PMGs were administered to the latter group. Both groups started on MAC<sup>+</sup> diet (day  
766 0). f\_\_ indicates that a strain is not assigned at the family level in the Greengenes database; NA  
767 indicates lack of taxonomic assignment at the family level. **C)** Microbial communities of mice  
768 that were treated transiently with PMGs (red crosses) remain distinct from mice on HFD alone  
769 (blue), even when PMGs are removed from HFD (red circles). **D)** *A. muciniphila* reaches a  
770 higher relative abundance in mice treated transiently with PMGs (\*\*  $P < 0.01$ , t-test). **E)** Taxa

771 that are significantly enriched due to transient PMG supplementation (positive) in water to HFD  
772 background (negative, mean +/- SEM, adjusted *P* value < 0.0005).

773 **Figure S7. Corresponds to Figure 5. A)** The distribution of number of putative mucin-  
774 degrading CGCs per genome amongst all phyla in the HGM database.

775

776 **Table S1.** Top 20 predictive taxa of the Random Forests classifier to predict HFD or HFD with  
777 transient PMG supplementation (Figure 4C,4D,S6B-E.).

778 **Table S2.** List of literature references for mucin-targeting GHs[25, 61–64].

779 Table S3. List of bacteria categorized as pathogens for the mucin-glycan degradation analysis  
780 presented in Figure 5.

781



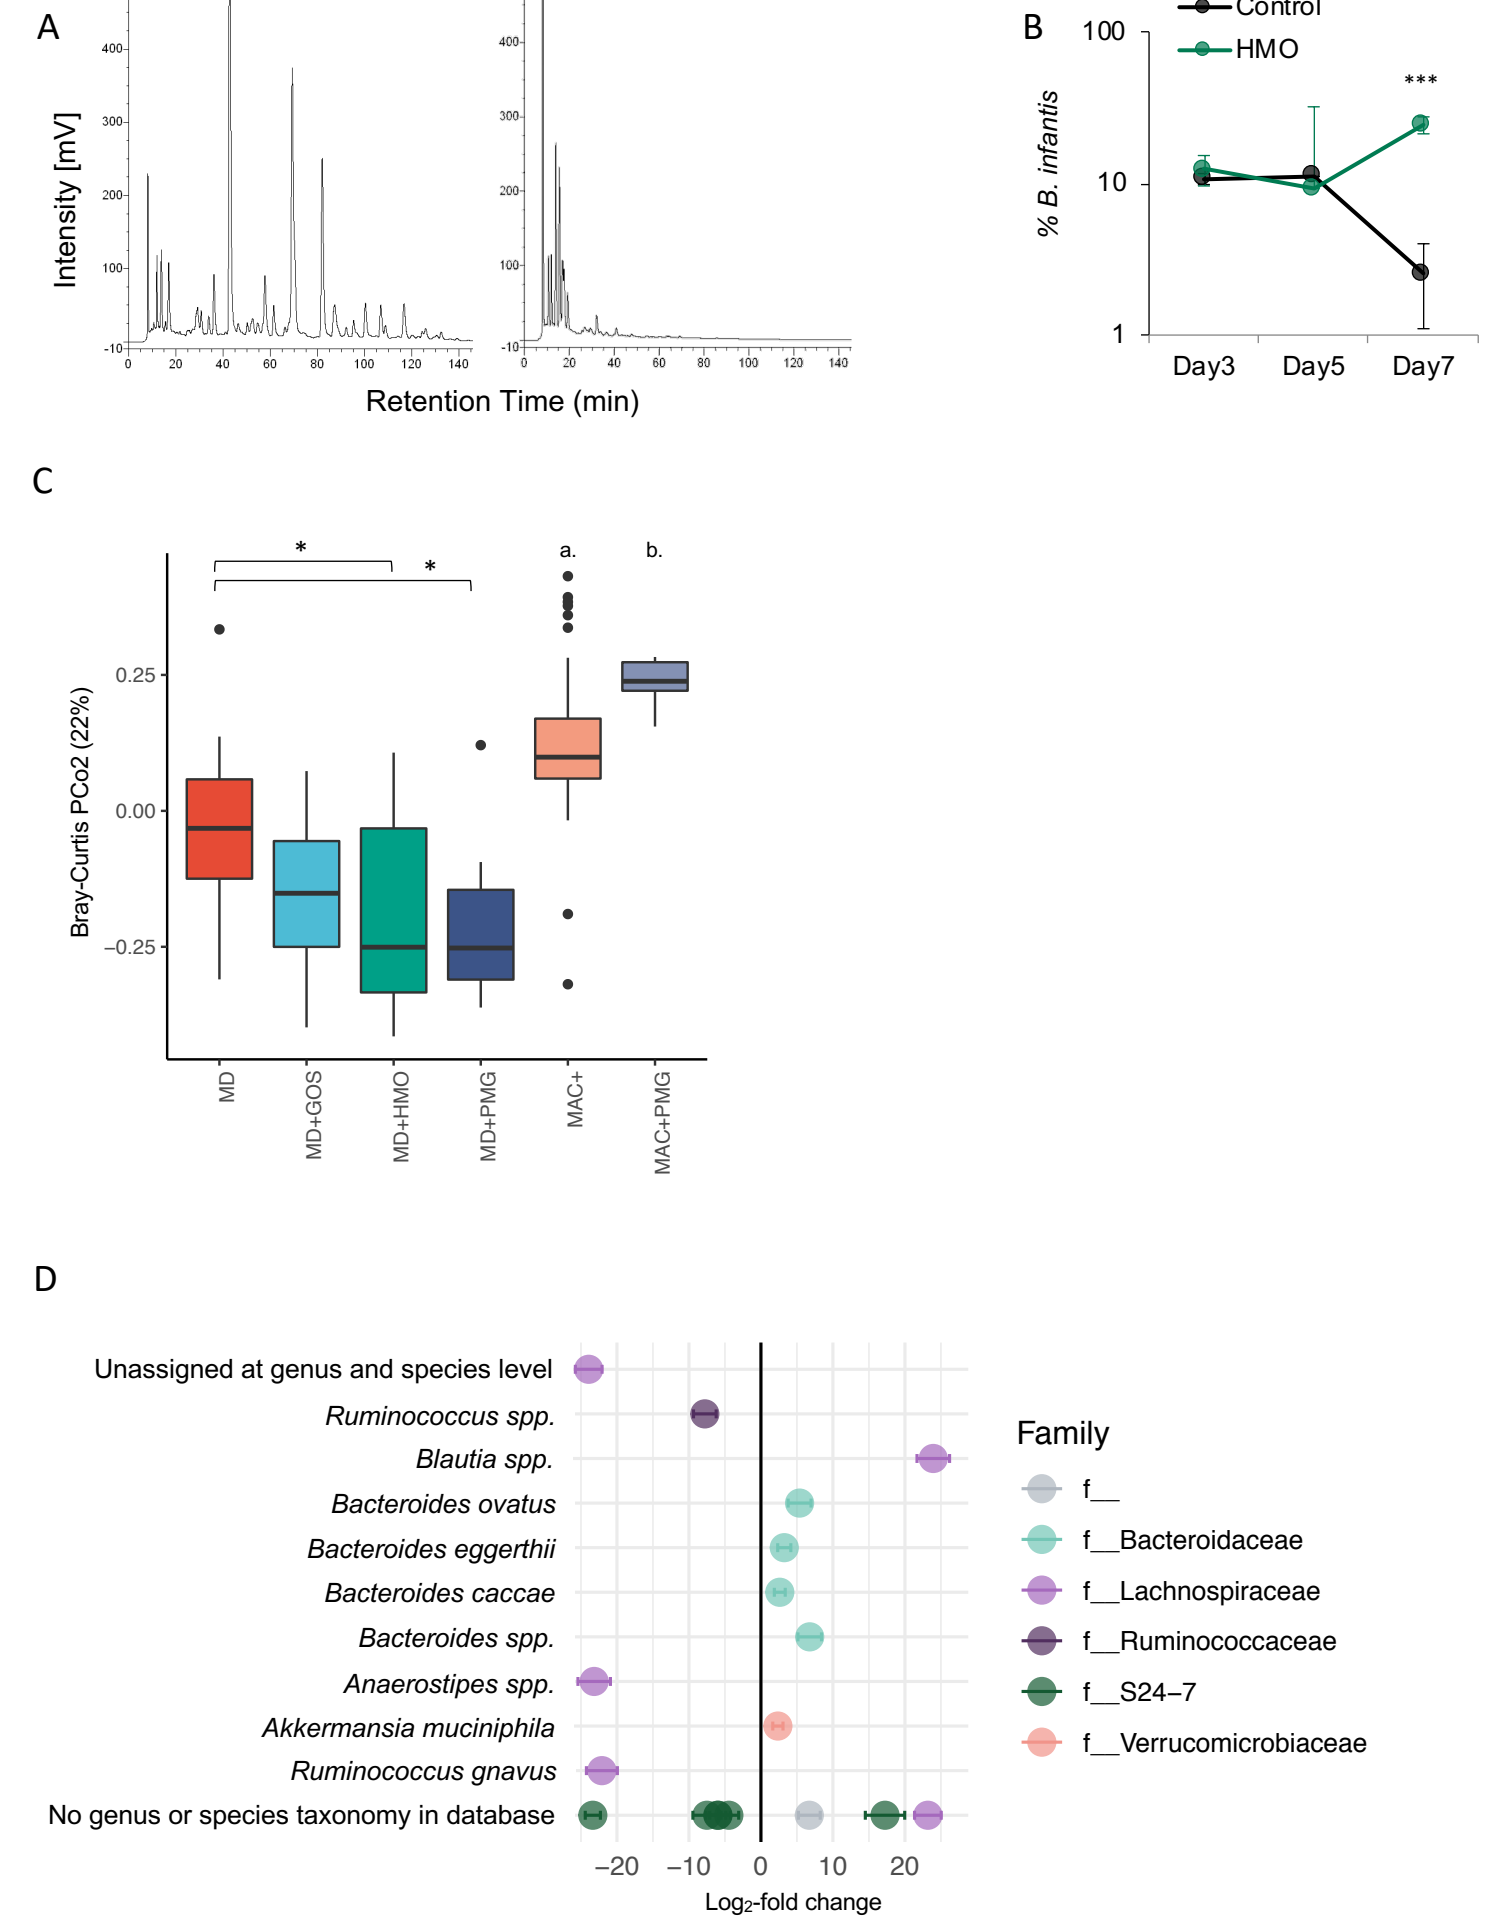

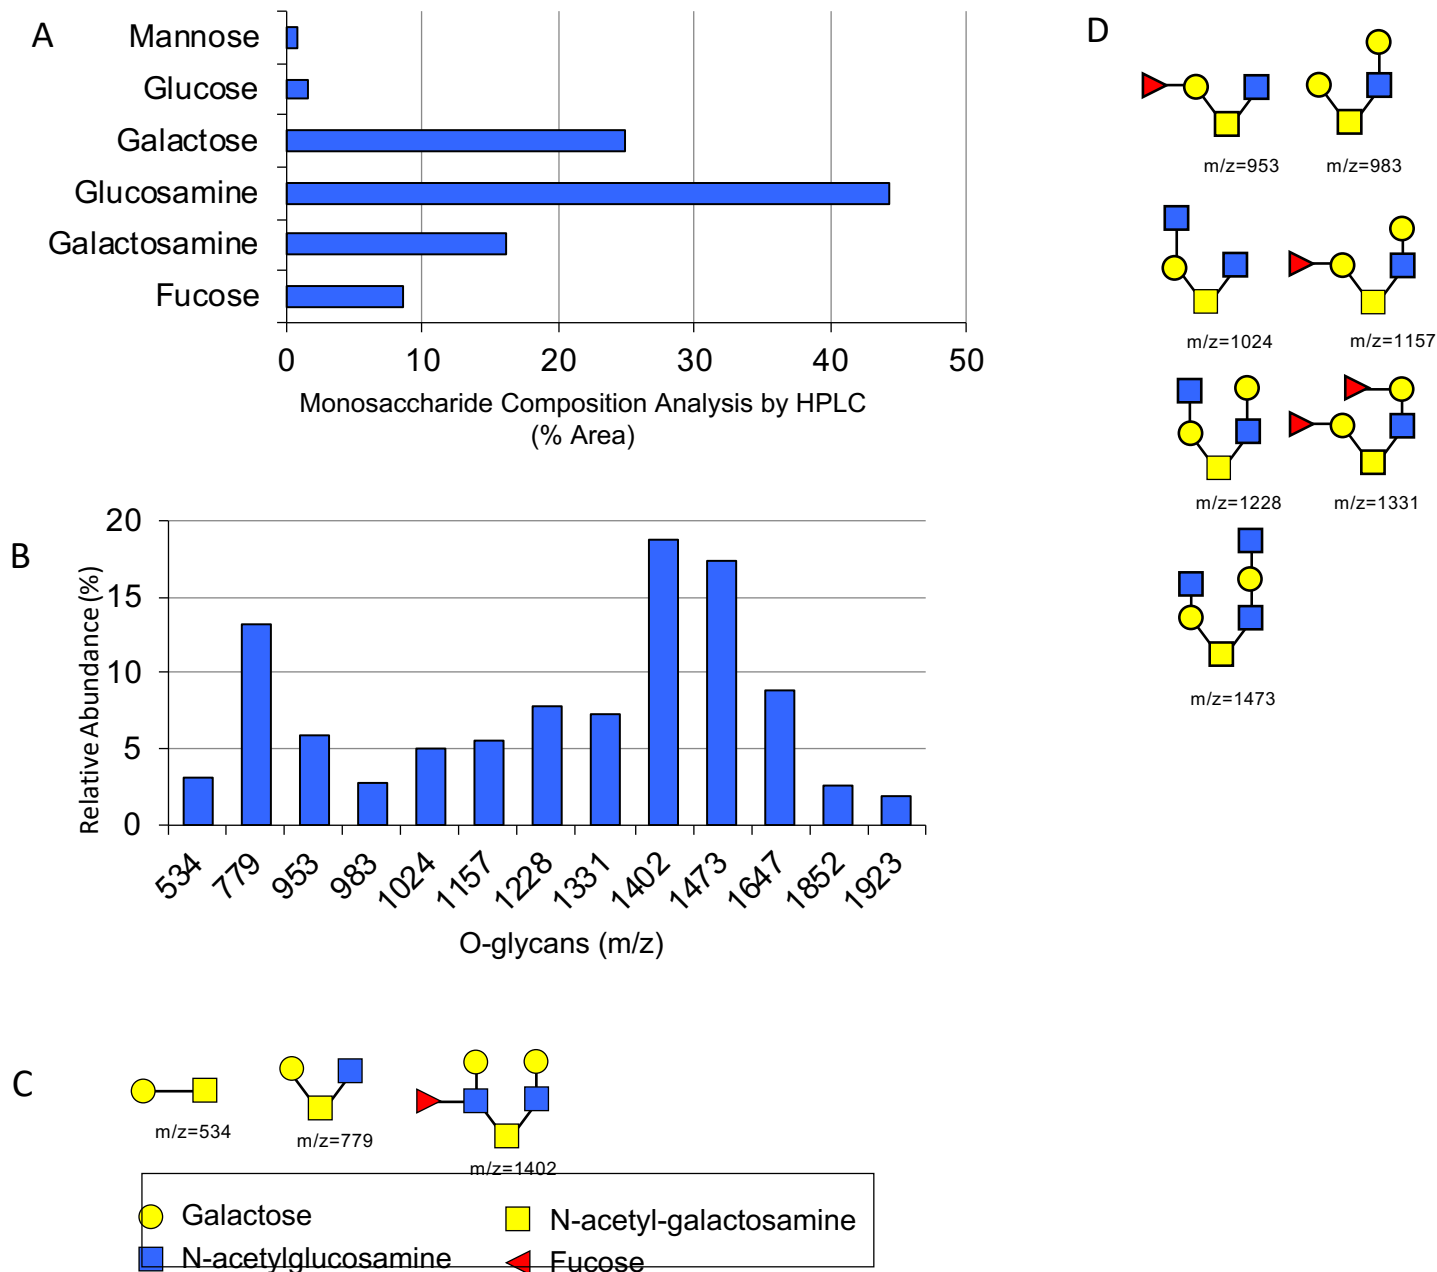

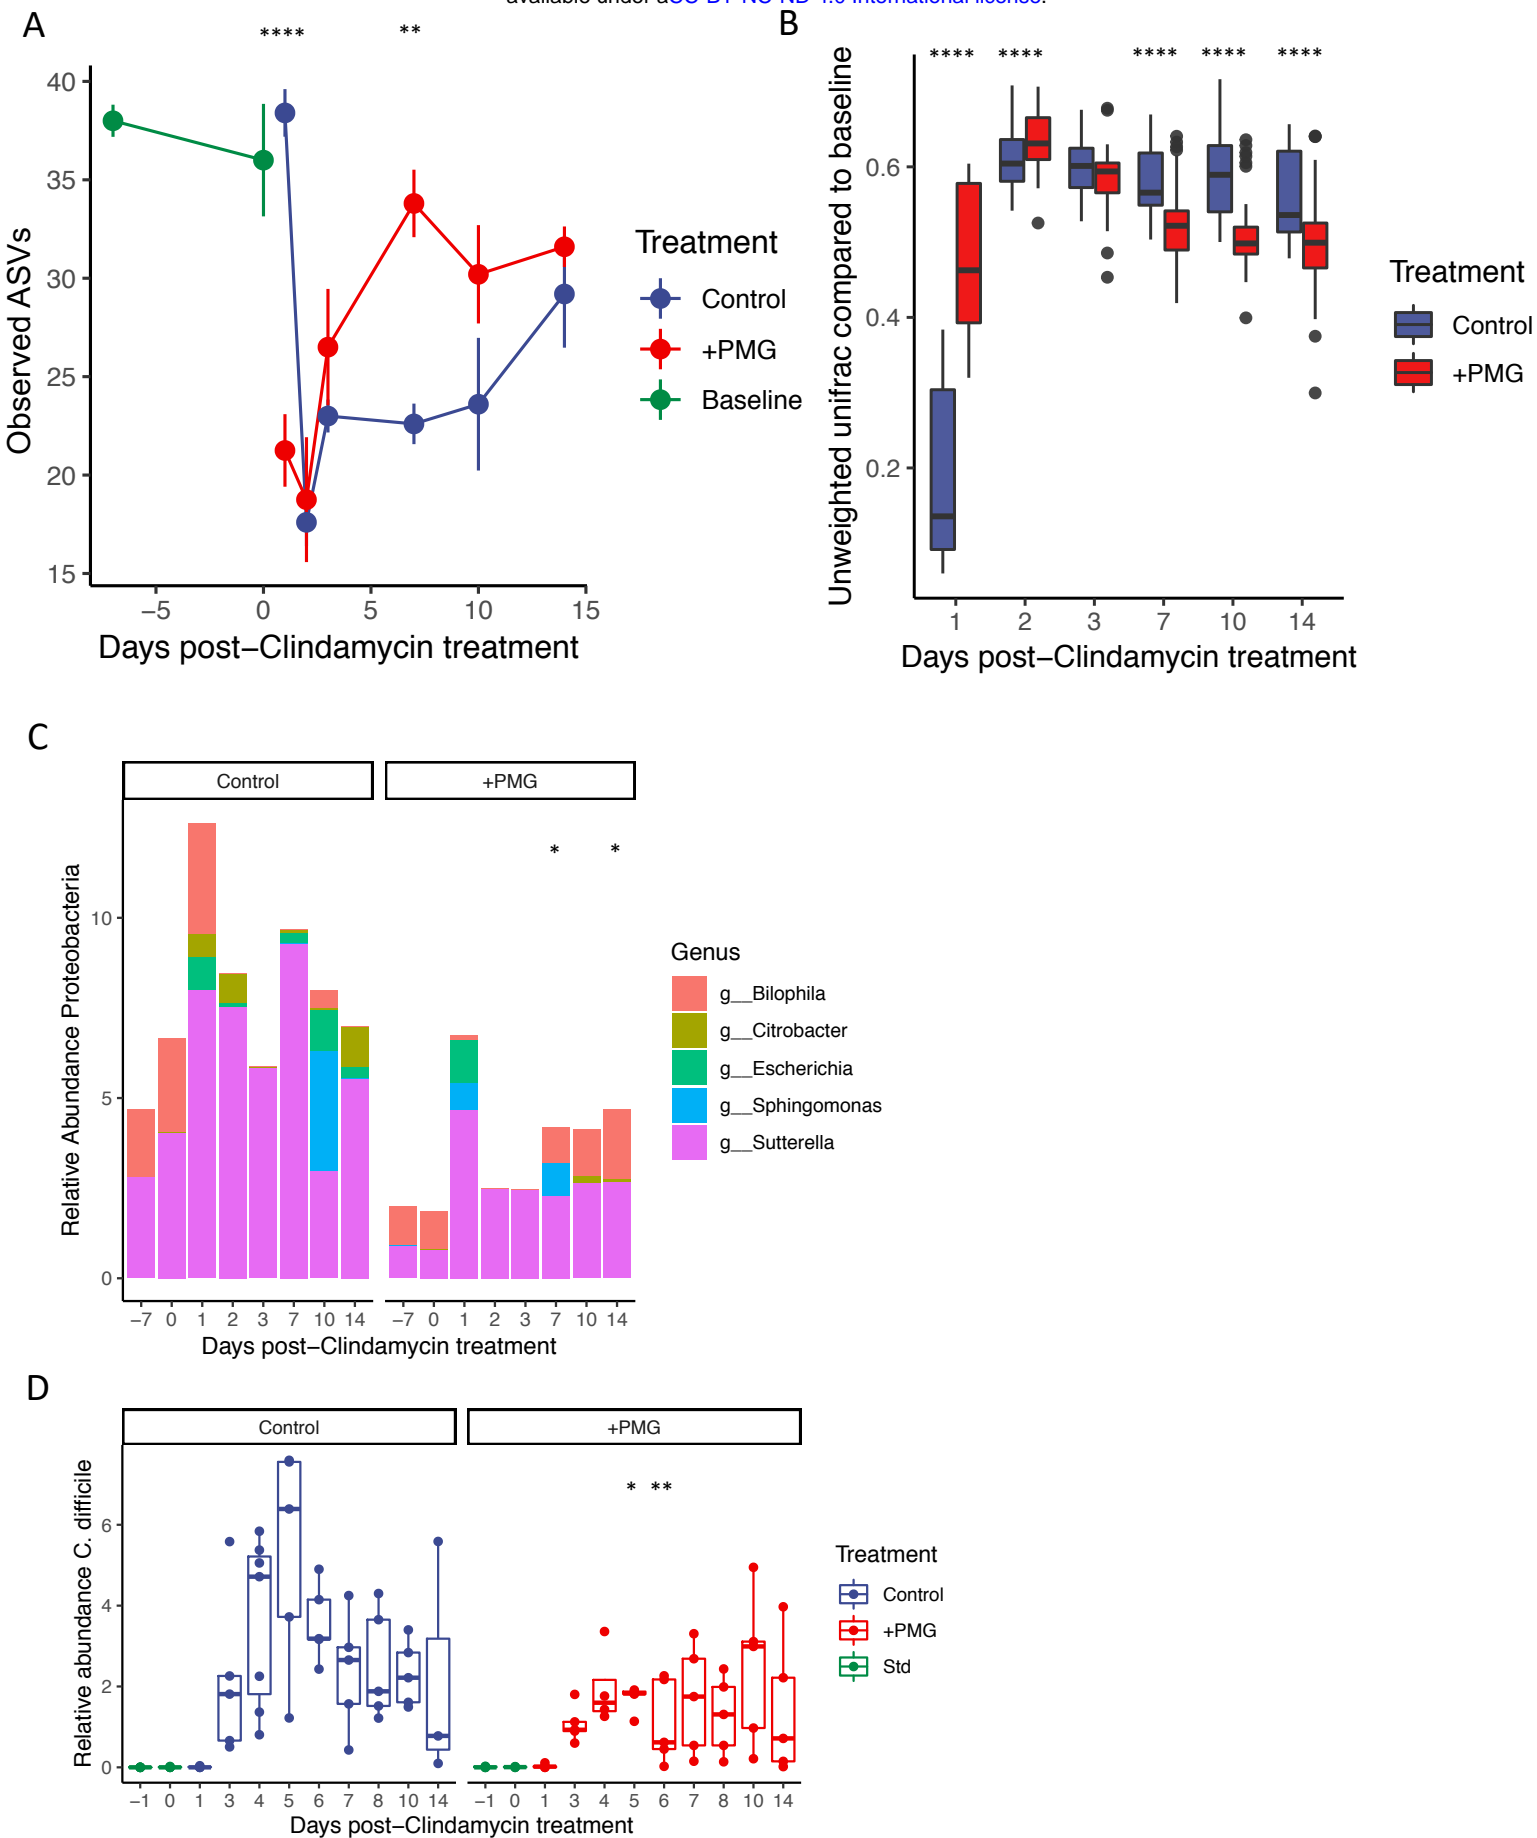

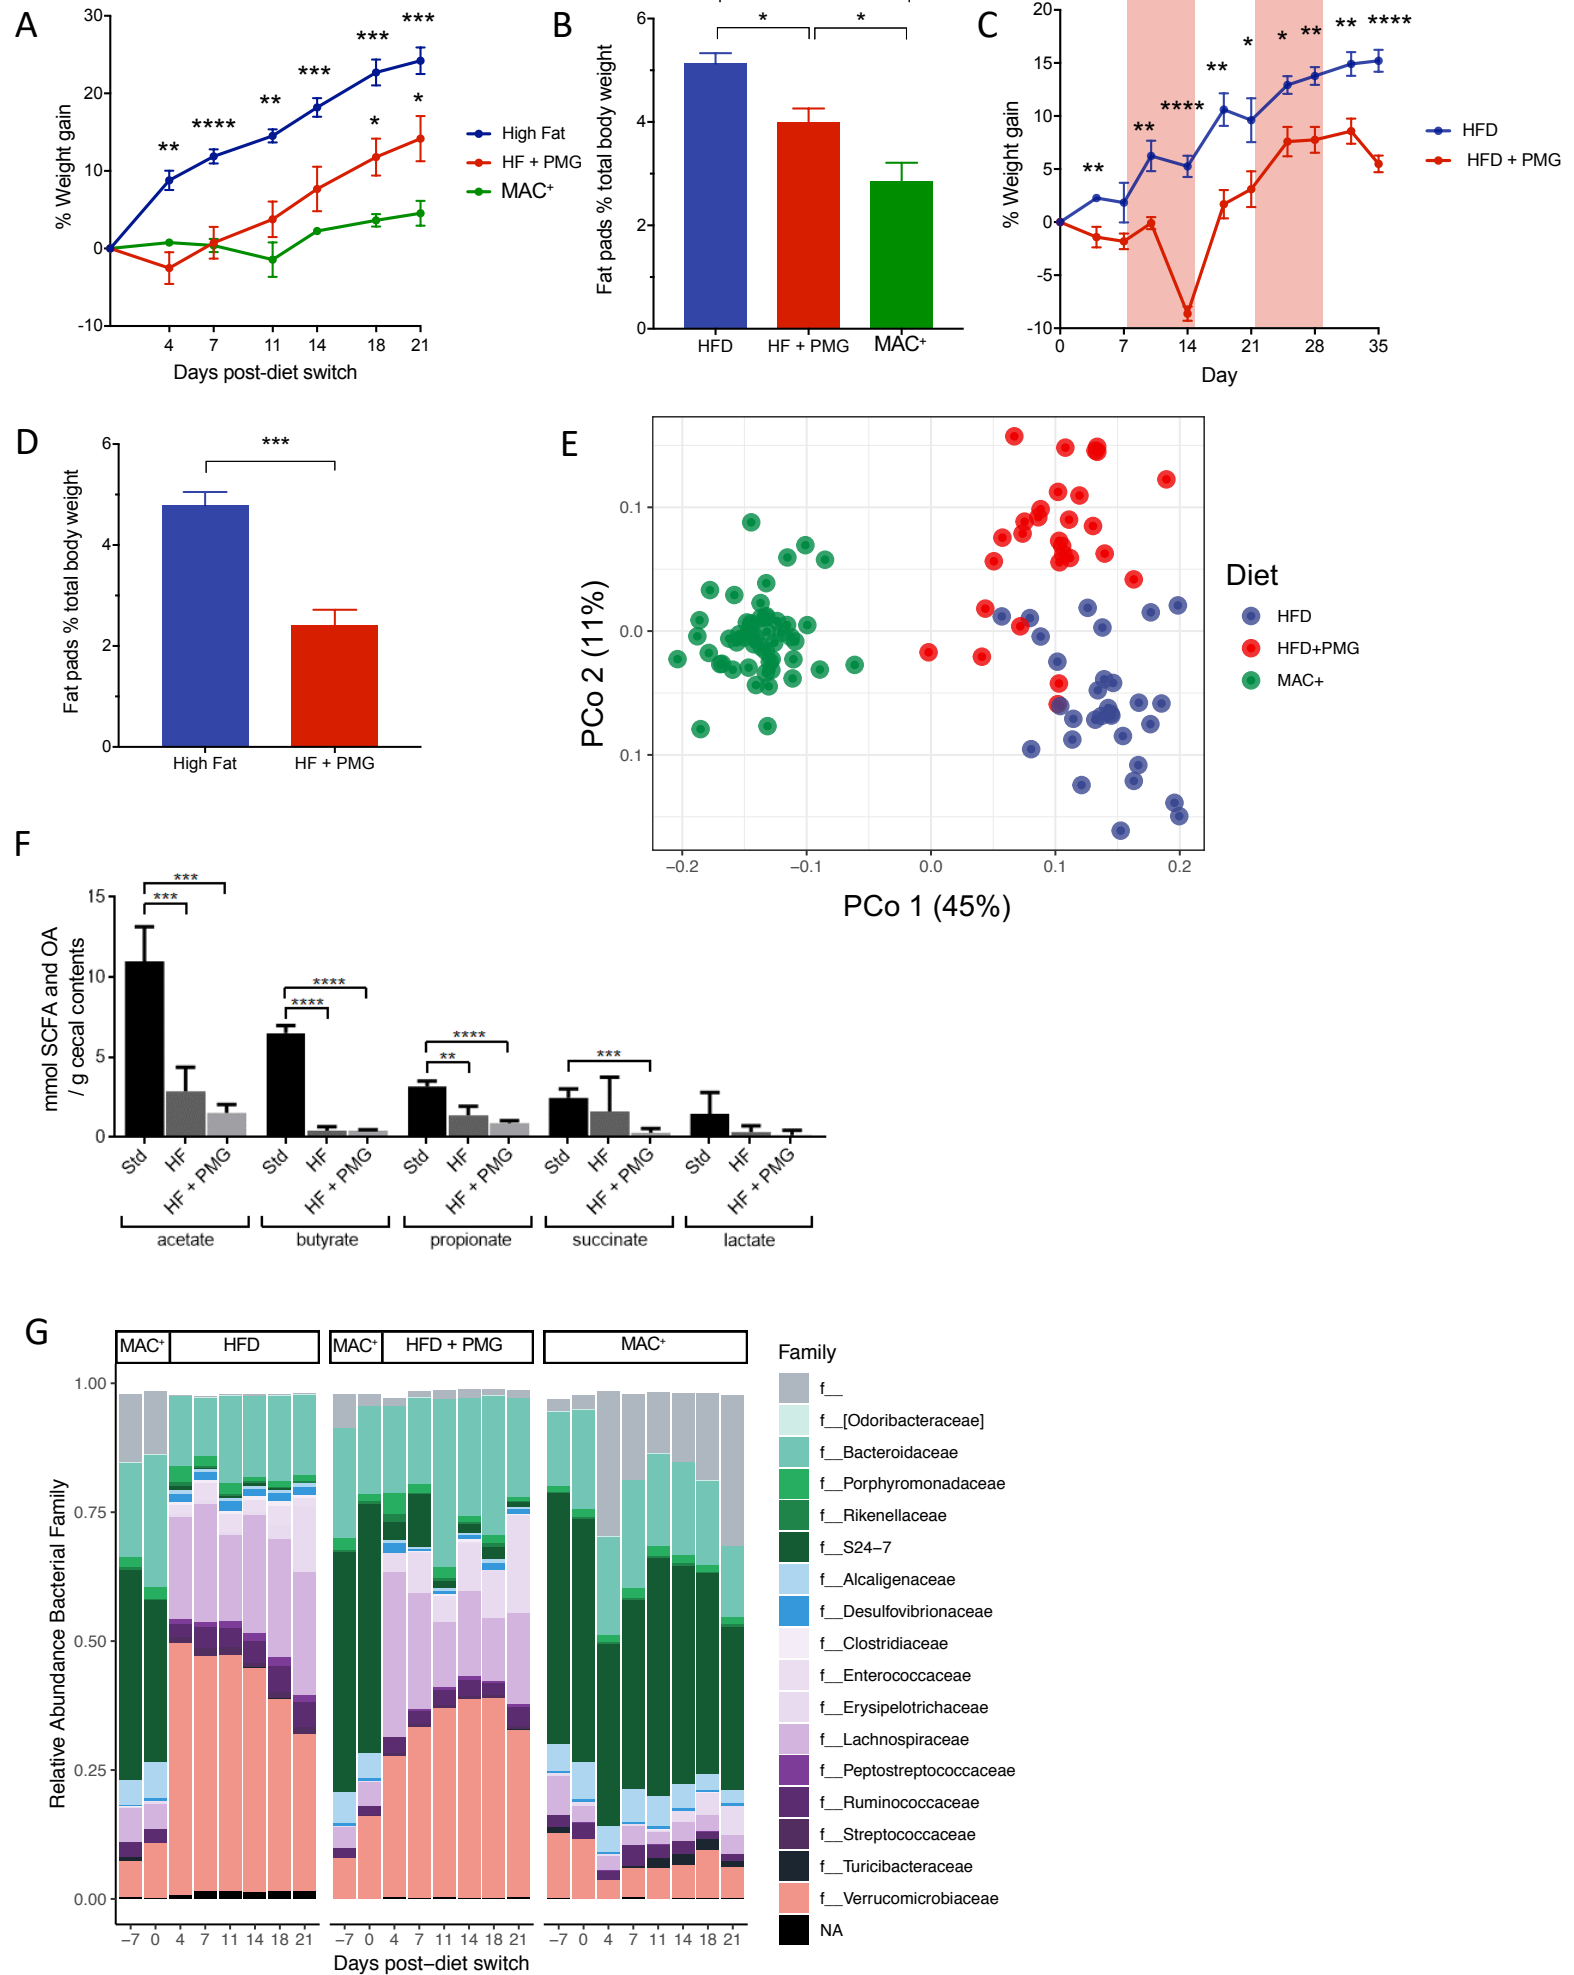

Figure 5

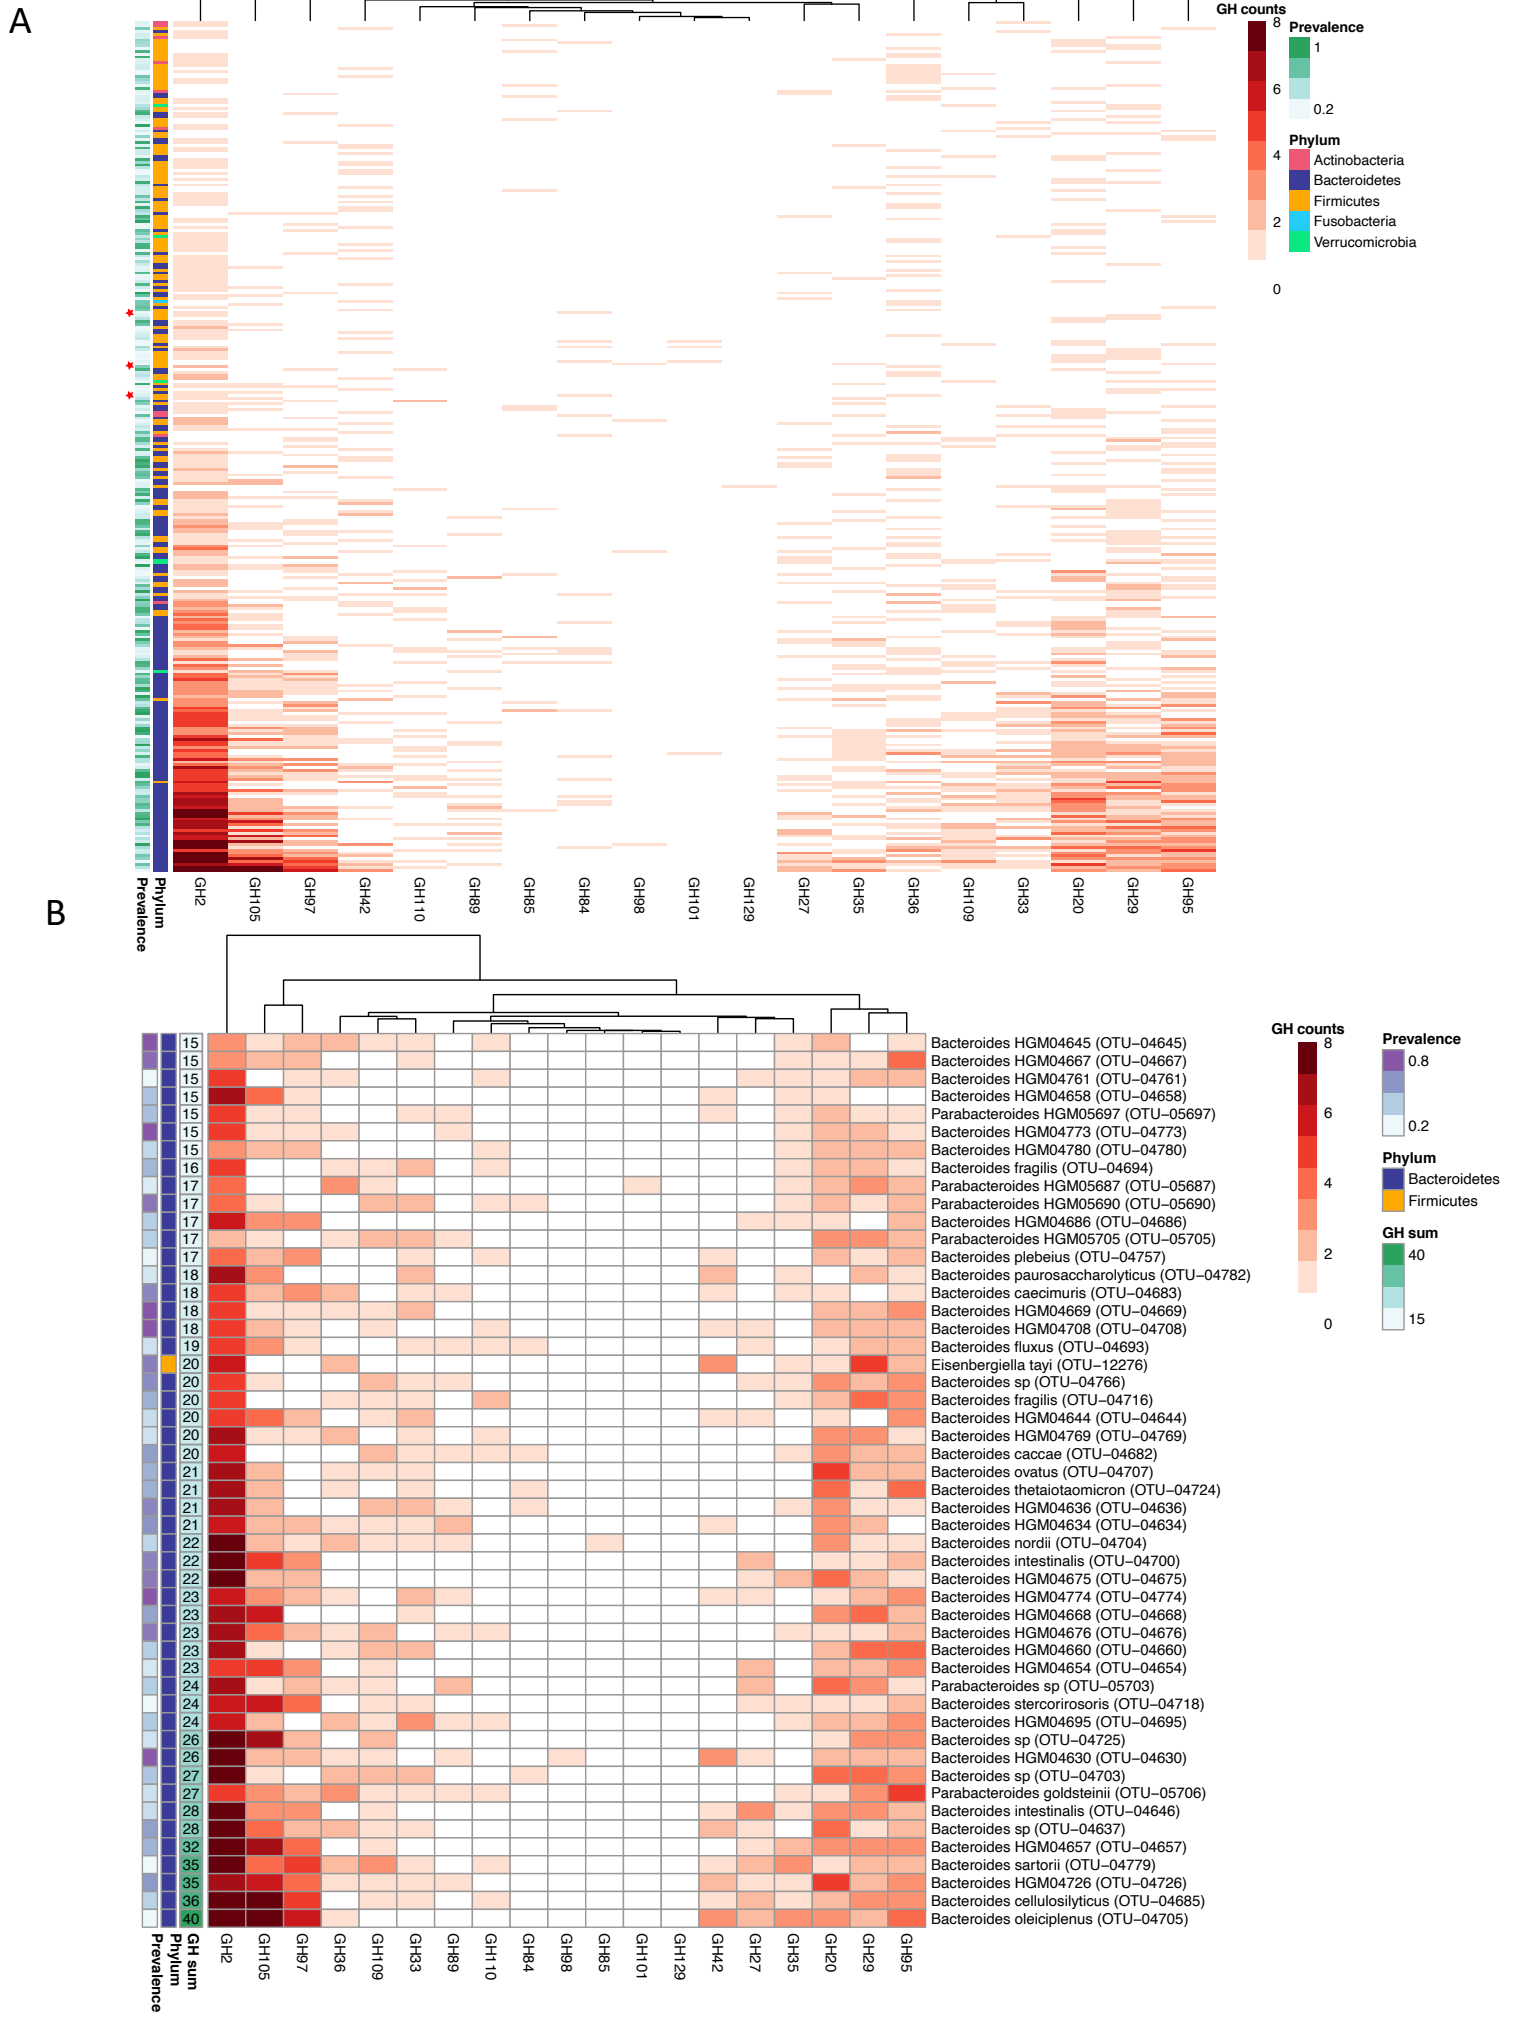

# Figure S1

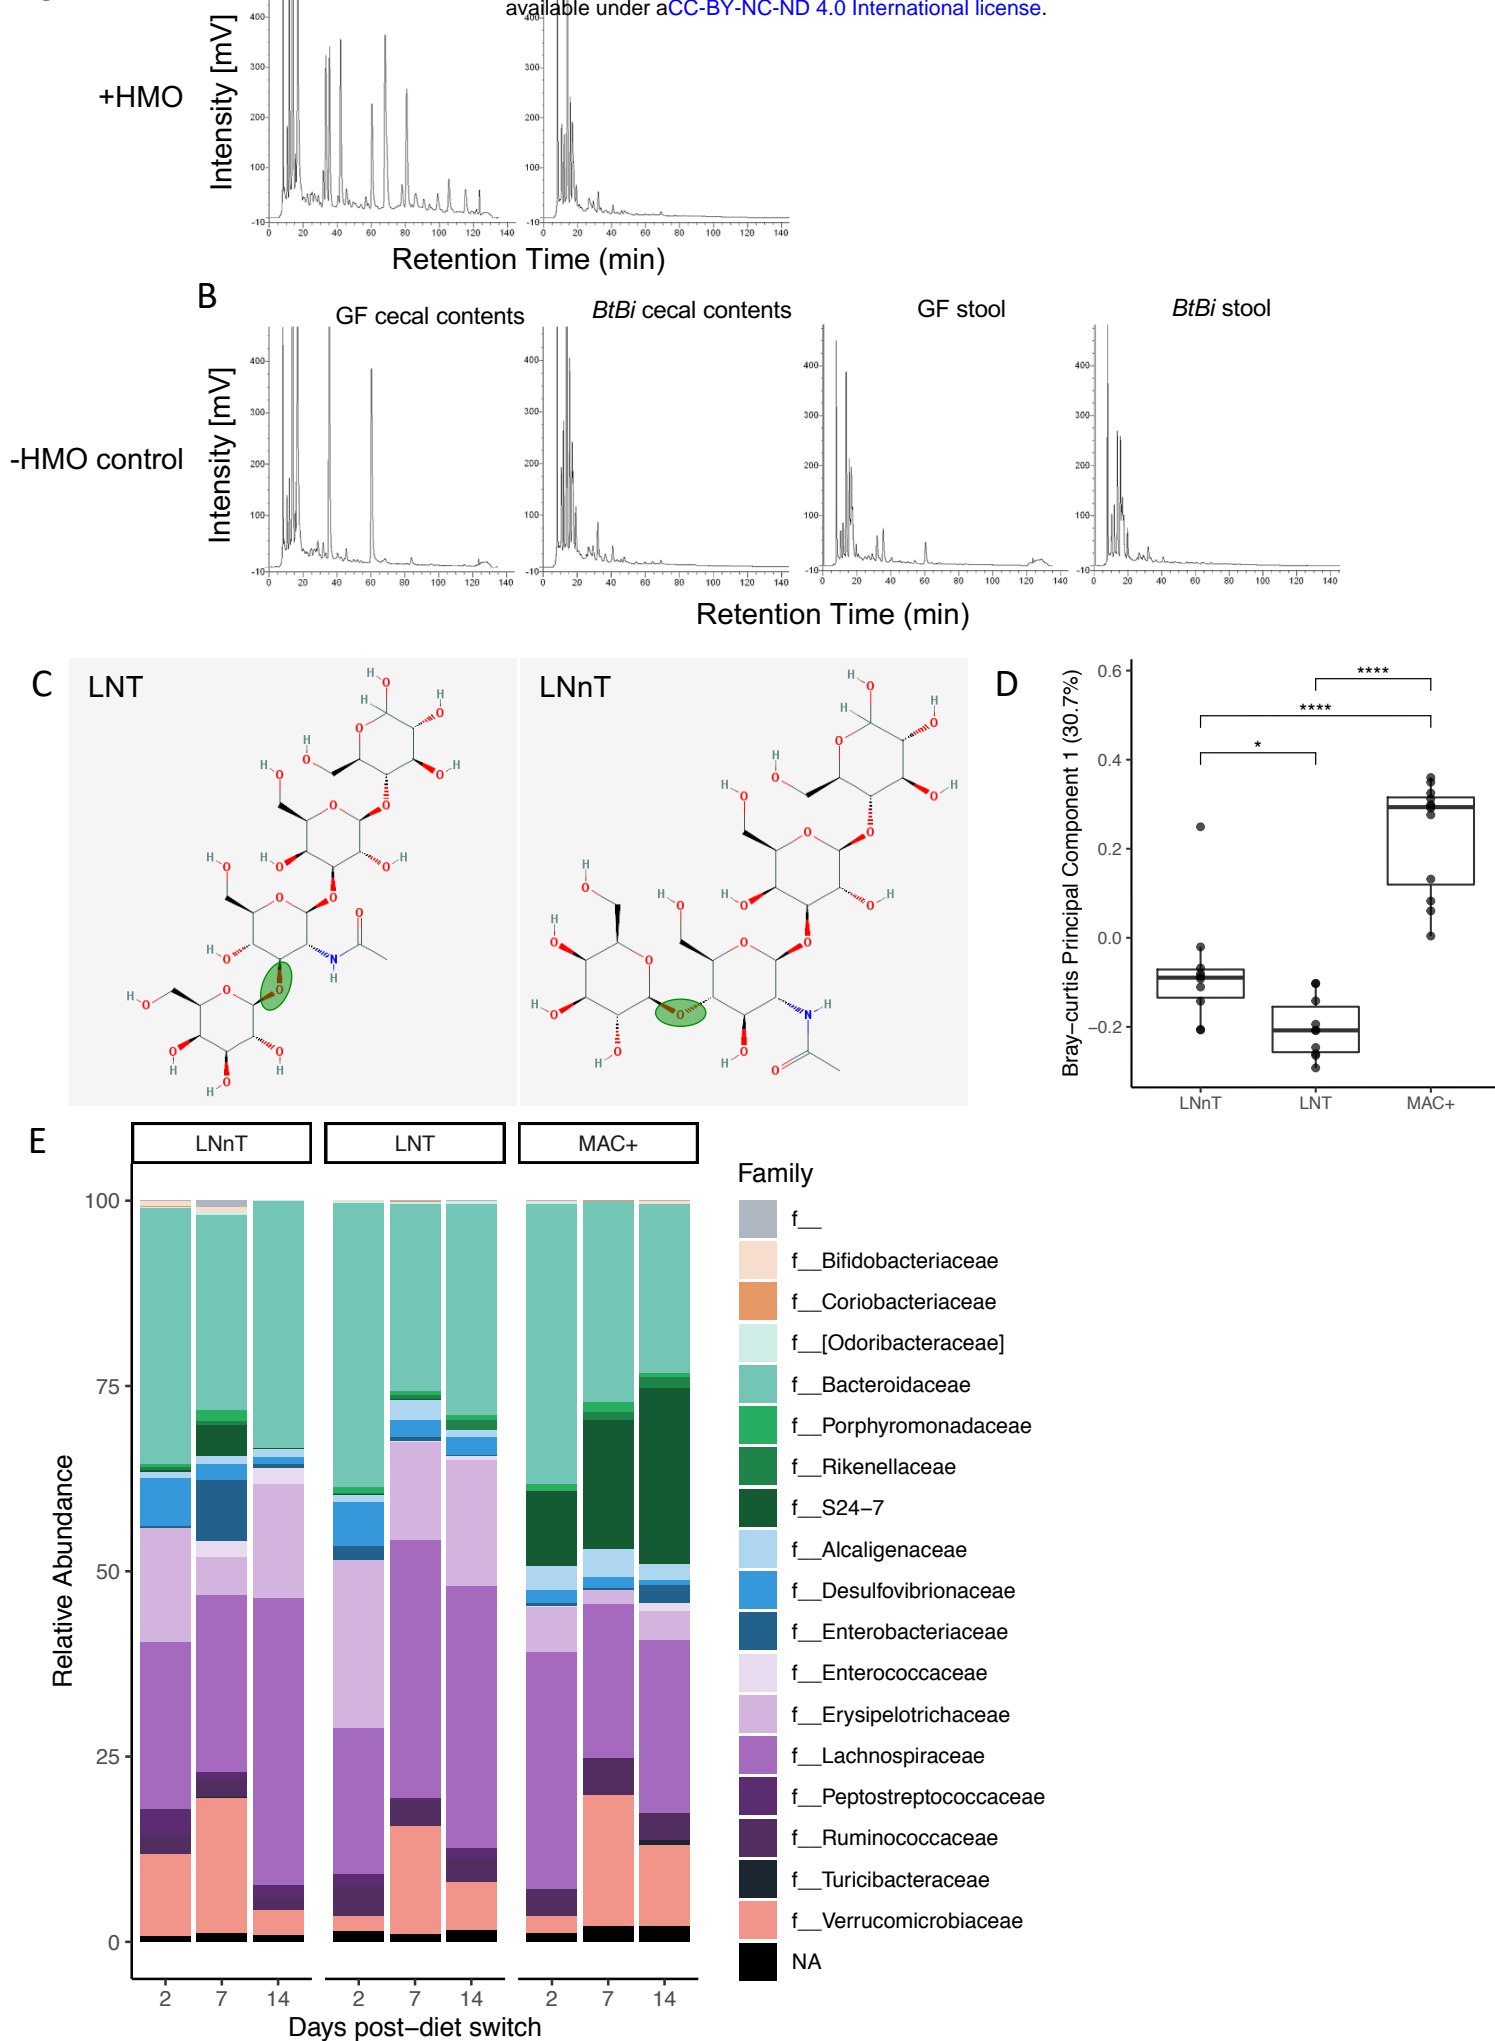

# Figure S2

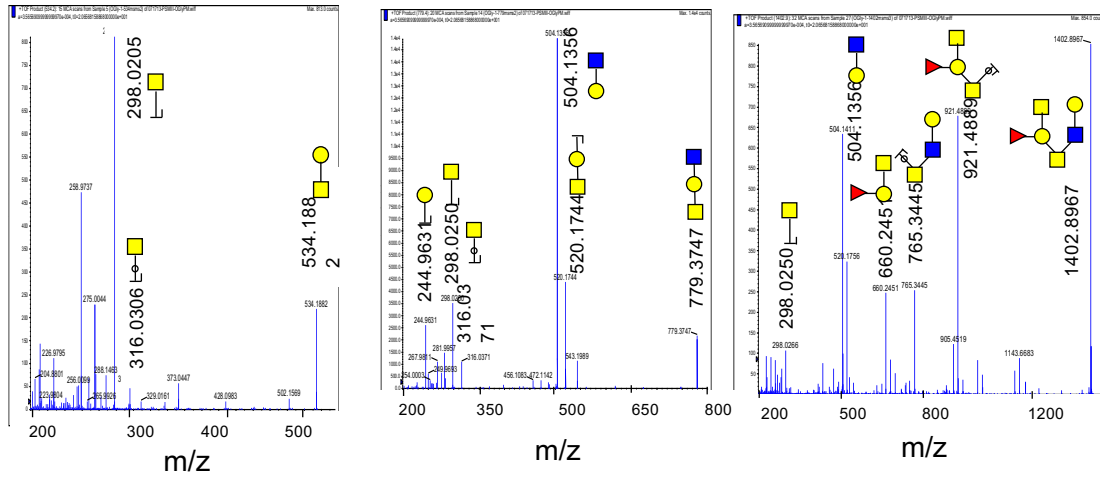

Figure S3.

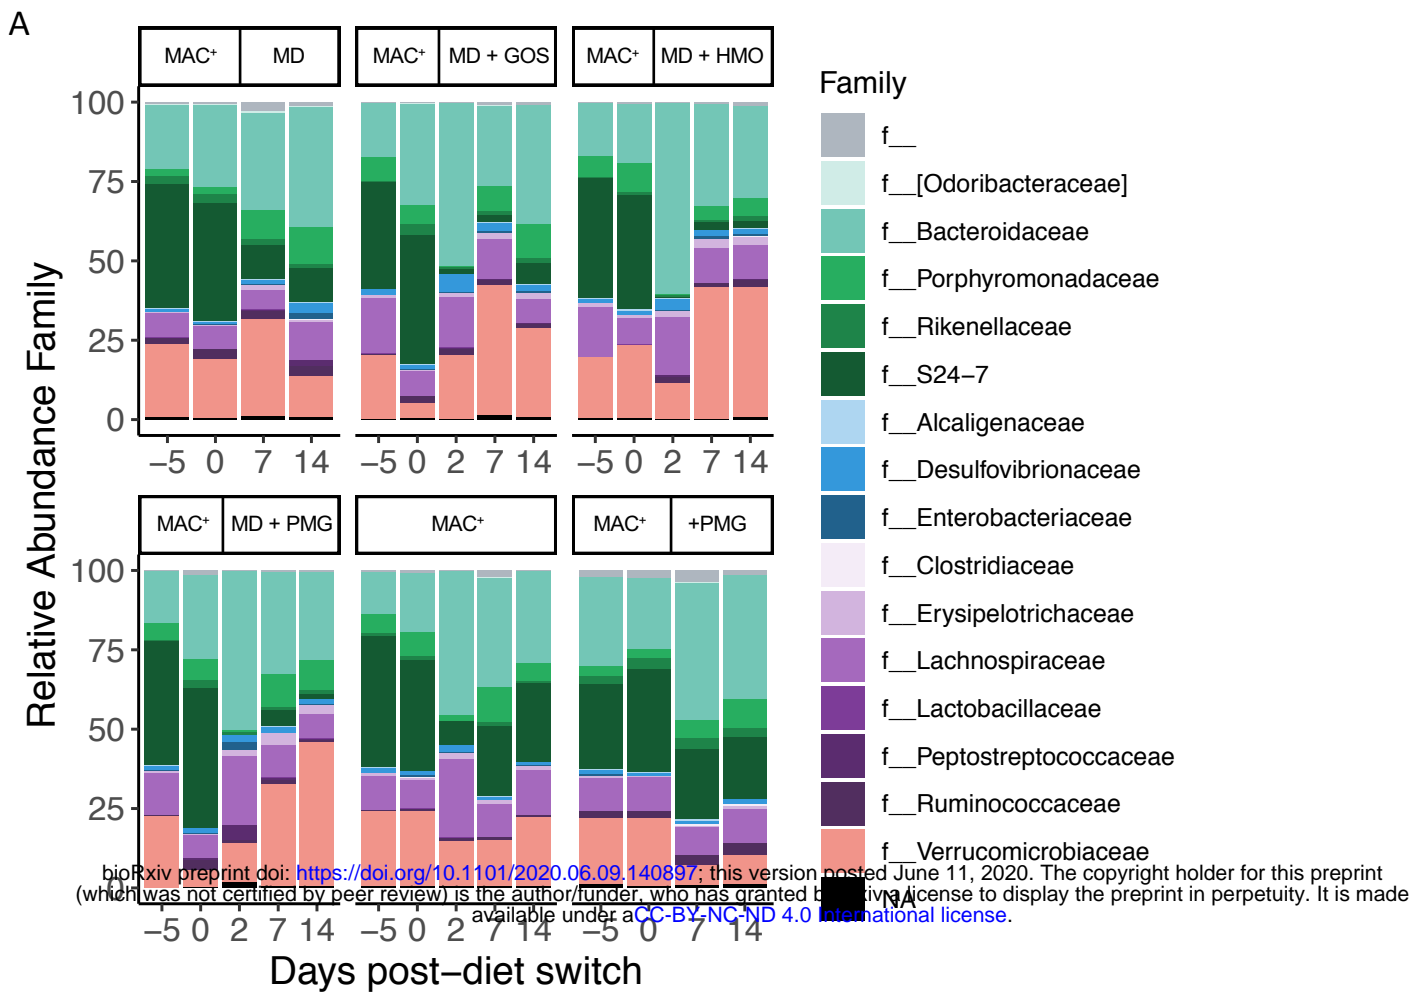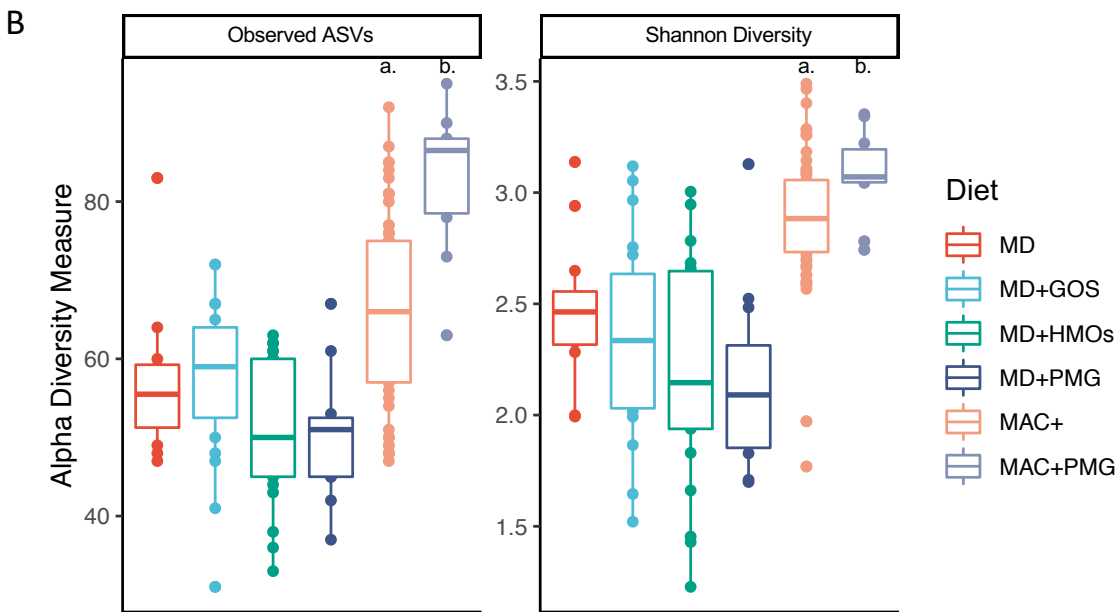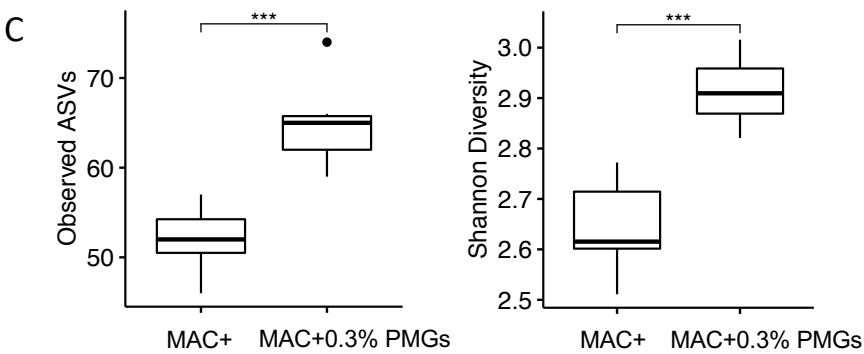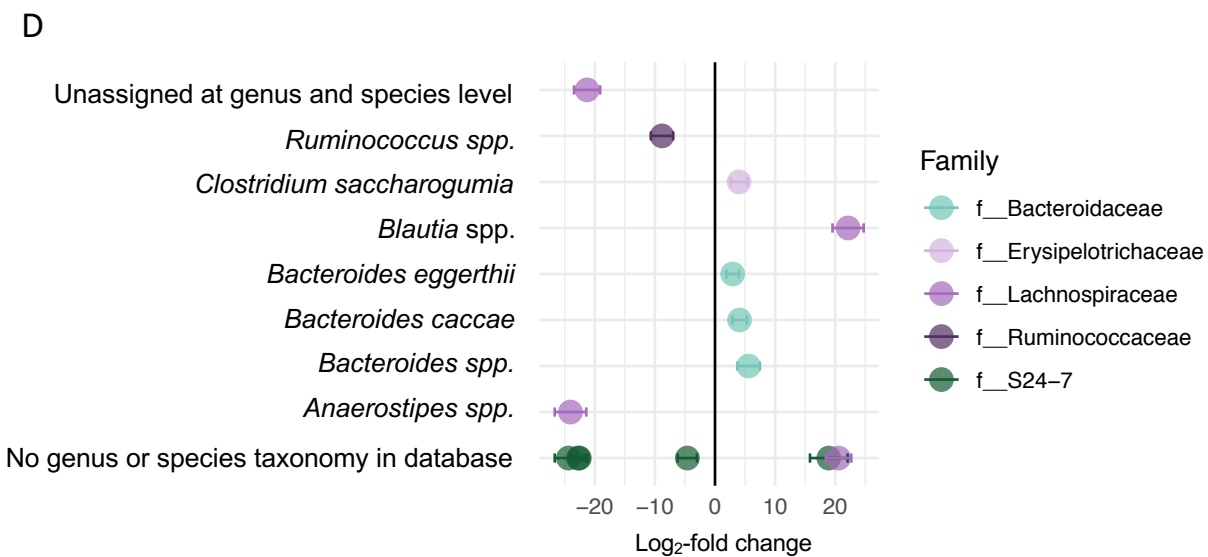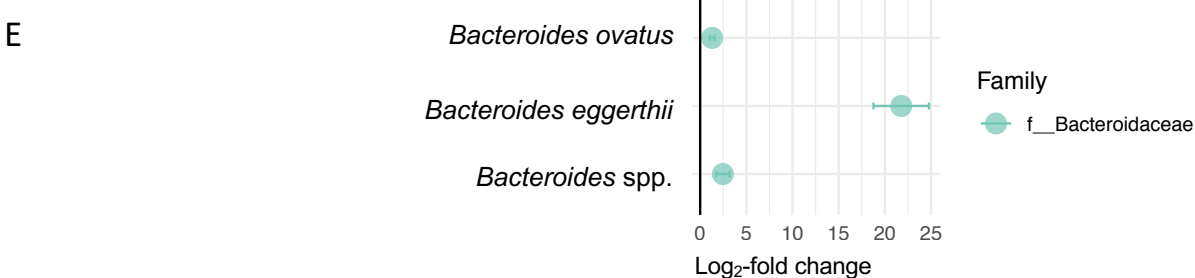



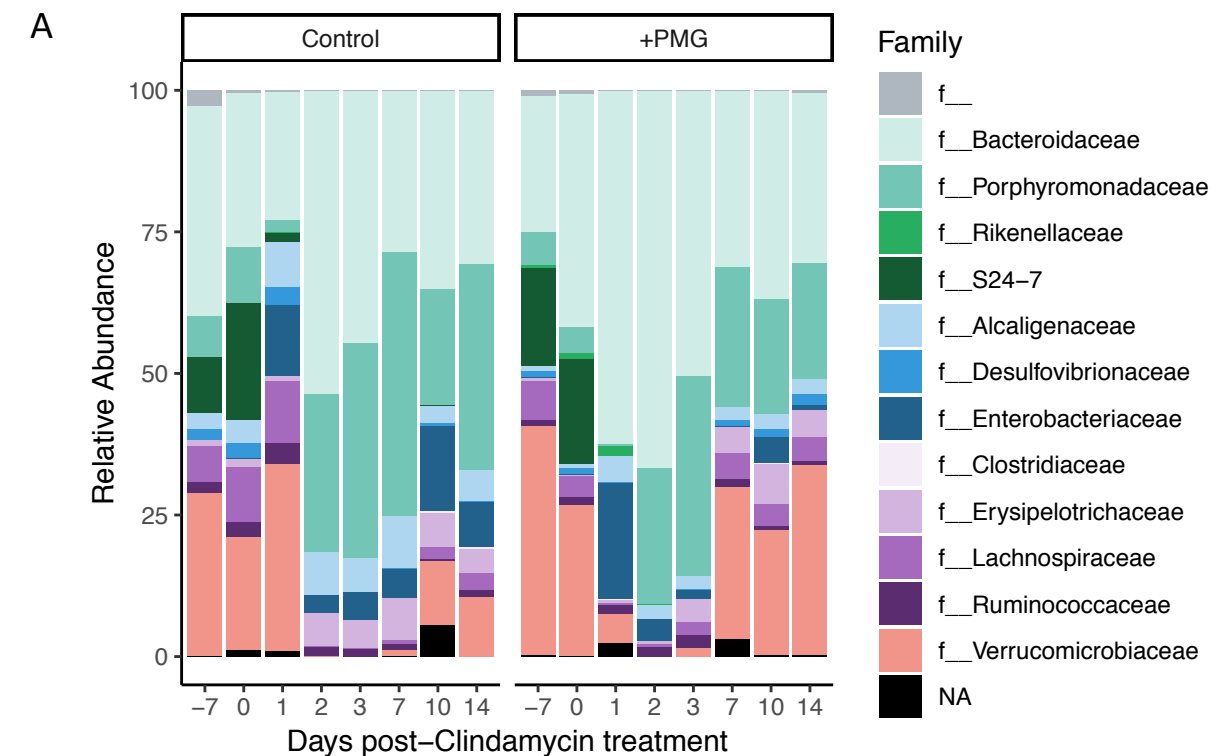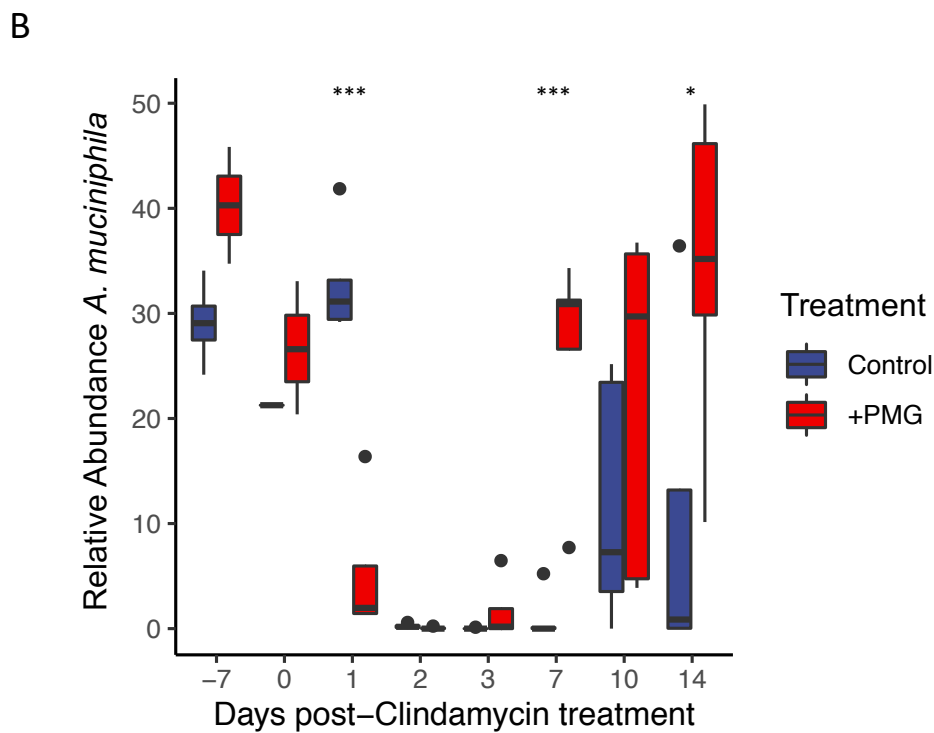

Figure S5

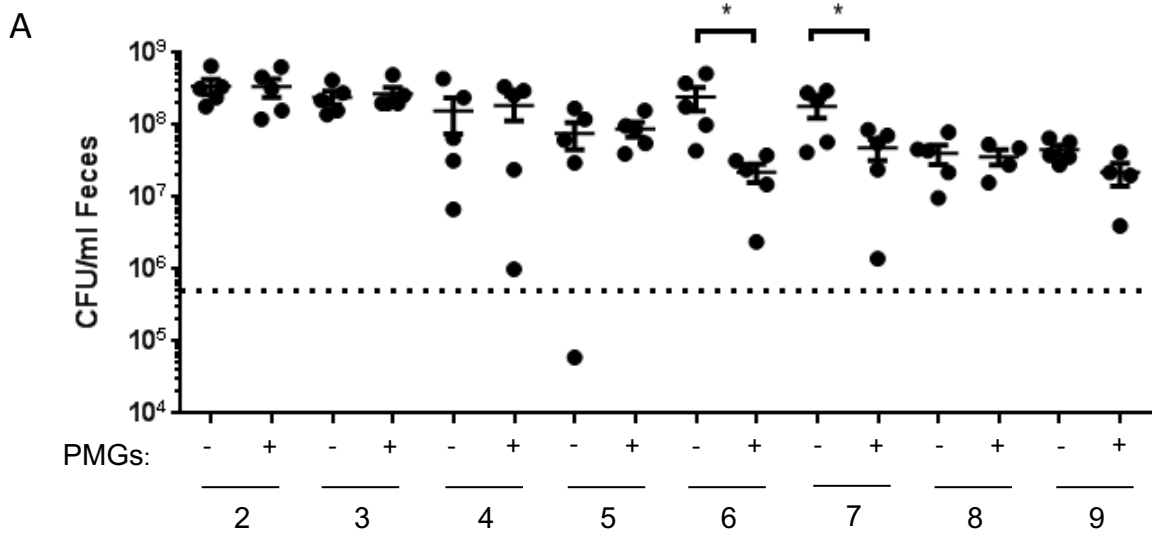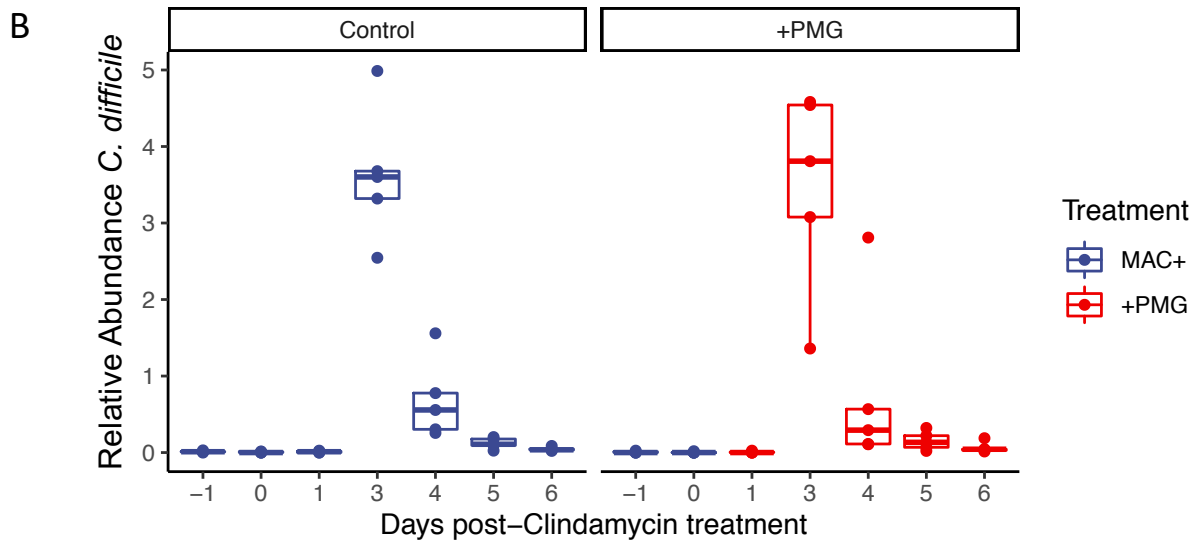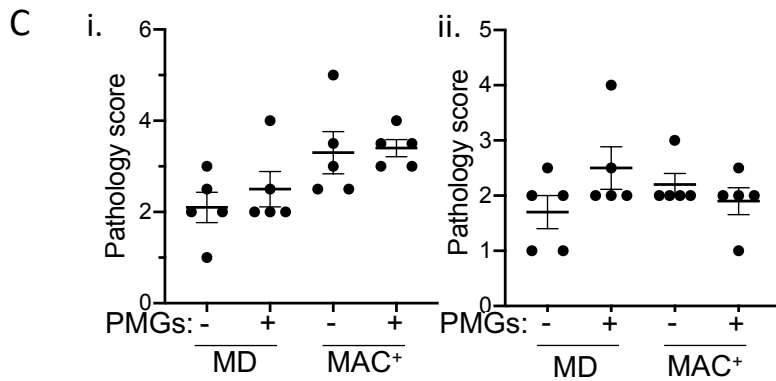

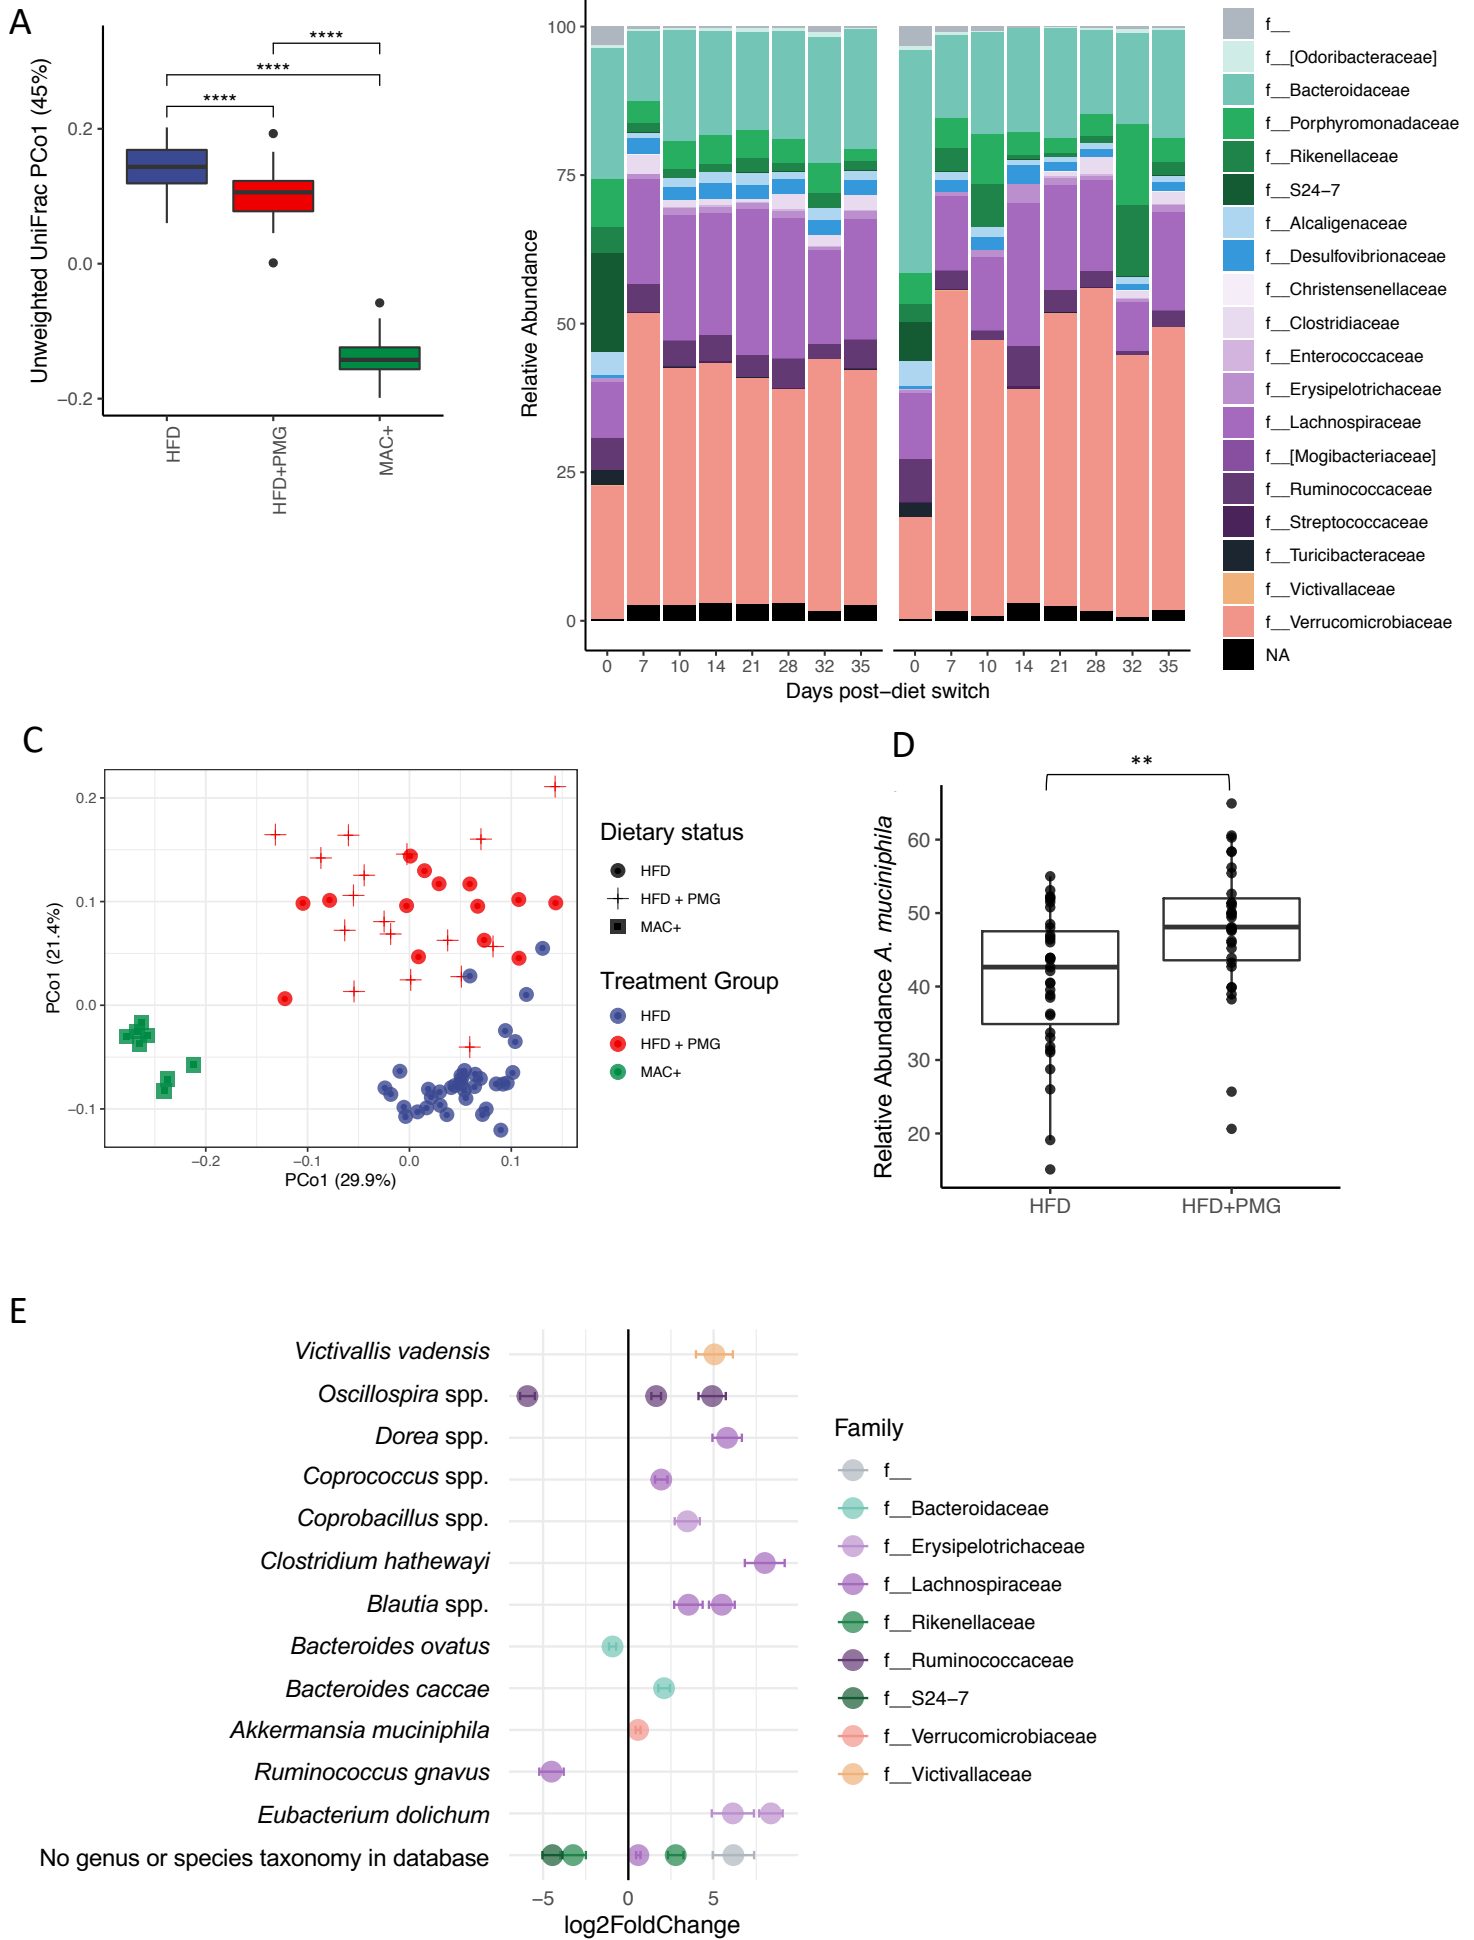

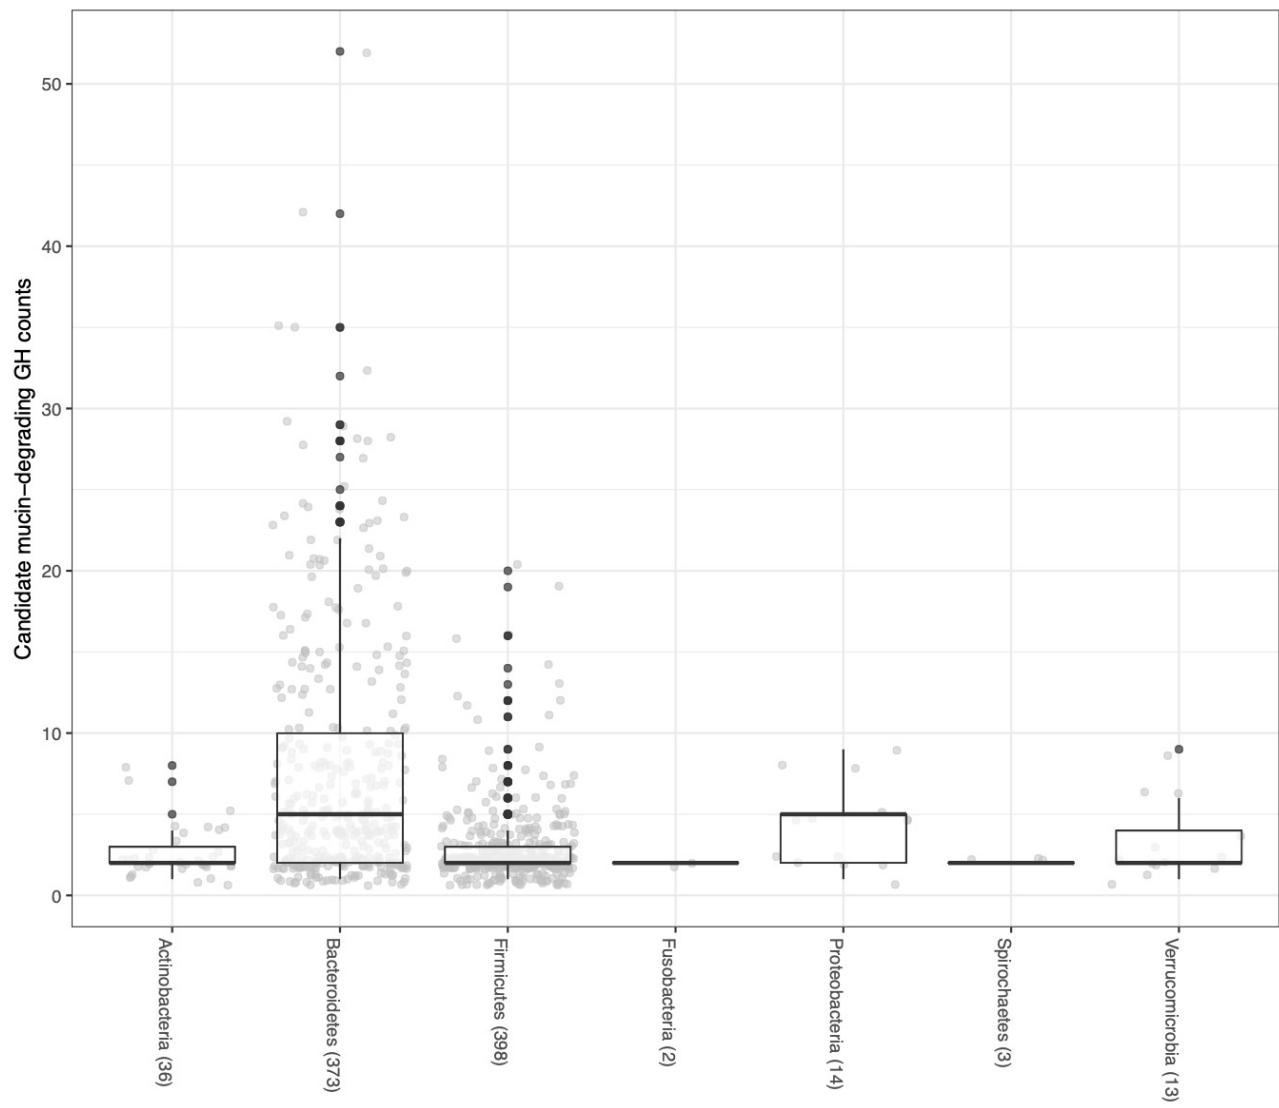

Source: http://biorxiv.org/content/10.1101/2020.06.09.140897v1.full.pdf
